# Supplementary material for: Differential expression in leaves of Saccharum genotypes contrasting in biomass production provides evidence of genes involved in carbon partitioning
Source: PubMed Central journal article supplement (PMC7526157; doi:10.1186/s12864-020-07091-y), 2020-09-29
Supplement: 12864_2020_7091_MOESM3_ESM.pdf [file 12864_2020_7091_MOESM3_ESM.pdf]

## S3 - Supporting information for results

### 1 Mapping and quantification

Mapping rates of preprocessed reads obtained with Salmon [1] are shown in Table 1.

Table 1: Salmon mapping rates of the preprocessed reads. Table contains the percentage of mapping rate for samples in both high and low biomass groups.

| Sample            | Group        | Mapping rate (%) |
|-------------------|--------------|------------------|
| IJ76-318          | High biomass | 83.91            |
| IN84-58           | High biomass | 82.27            |
| IN84-58           | High biomass | 83.53            |
| IN84-58           | High biomass | 82.76            |
| IN84-88           | High biomass | 83.59            |
| Krakatau          | High biomass | 82.03            |
| SES205A           | High biomass | 83.00            |
| SES205A           | High biomass | 84.71            |
| SES205A           | High biomass | 80.52            |
| US85-1008         | High biomass | 83.56            |
| US85-1008         | High biomass | 80.84            |
| US85-1008         | High biomass | 84.22            |
| Criolla Rayada    | Low biomass  | 84.36            |
| RB72454           | Low biomass  | 83.41            |
| RB72454           | Low biomass  | 82.99            |
| RB72454           | Low biomass  | 83.40            |
| RB855156          | Low biomass  | 84.93            |
| SP80-3280         | Low biomass  | 82.62            |
| SP80-3280         | Low biomass  | 85.37            |
| SP80-3280         | Low biomass  | 84.27            |
| TUC71-7           | Low biomass  | 84.98            |
| White Transparent | Low biomass  | 83.93            |
| White Transparent | Low biomass  | 83.65            |
| White Transparent | Low biomass  | 83.69            |

### 2 Differential expression and functional enrichment analyses

#### 2.1 Sample clustering based on expression

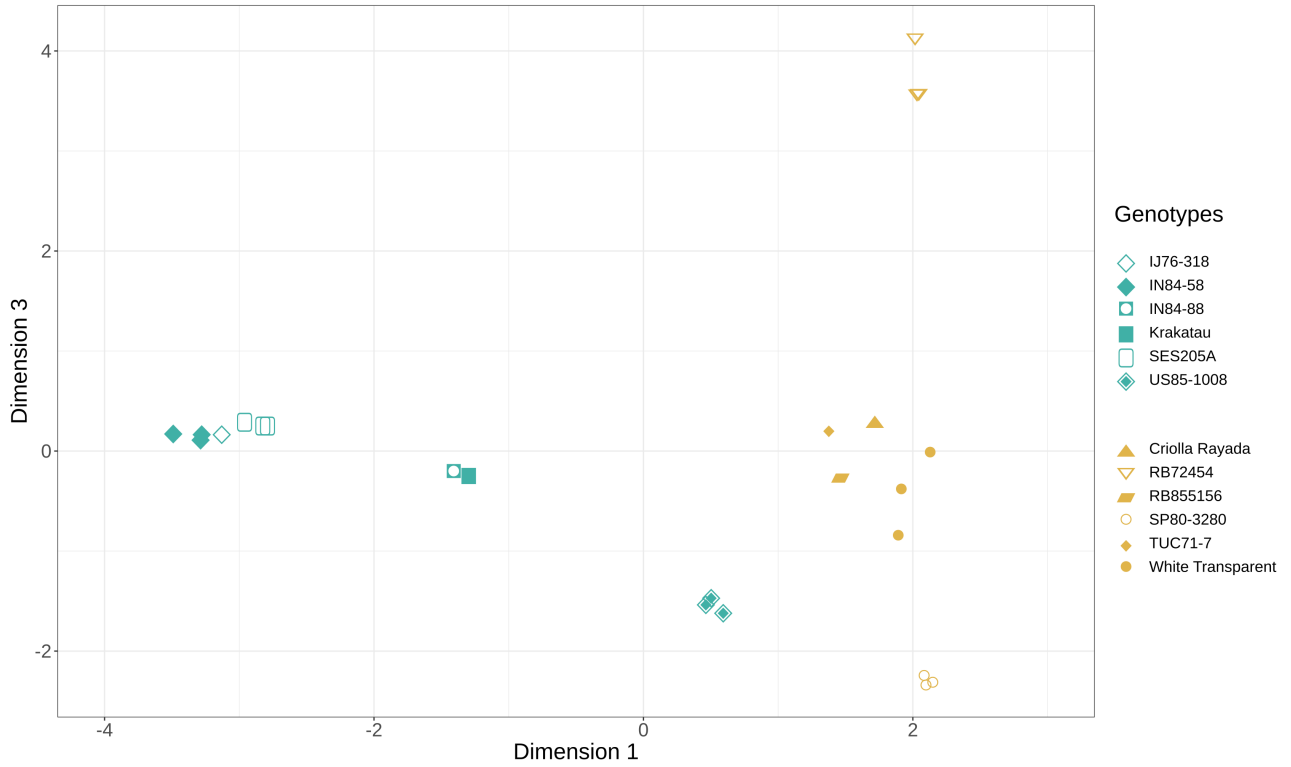

Figure 1: **Multidimensional scaling to assess dissimilarities between samples.** Blue symbols indicate high biomass genotypes, and low biomass genotypes are colored in orange.

## 2.2 Tests

Table 2: Results of the differential expression analysis in the three proposed tests: i) Low biomass group compared to high biomass group; ii) ANOVA-like test using genotypes within the high biomass group; iii) ANOVA-like test using genotypes within the low biomass group.

|                             | <b>Low biomass<br/>vs<br/>High biomass</b> | <b>ANOVA-like<br/>high biomass</b> | <b>ANOVA-like<br/>low biomass</b> |
|-----------------------------|--------------------------------------------|------------------------------------|-----------------------------------|
| Differentially expressed    | 21074                                      | 27981                              | 17099                             |
| Not significantly regulated | 26602                                      | 19695                              | 30577                             |

We evaluated Gene Ontology enriched terms in each of these tests, in the following order:

- Low biomass genotypes compared to the high biomass genotypes (Figure 3)
- Differences within the high biomass group (main document)
- Differences within the low biomass group (main document)

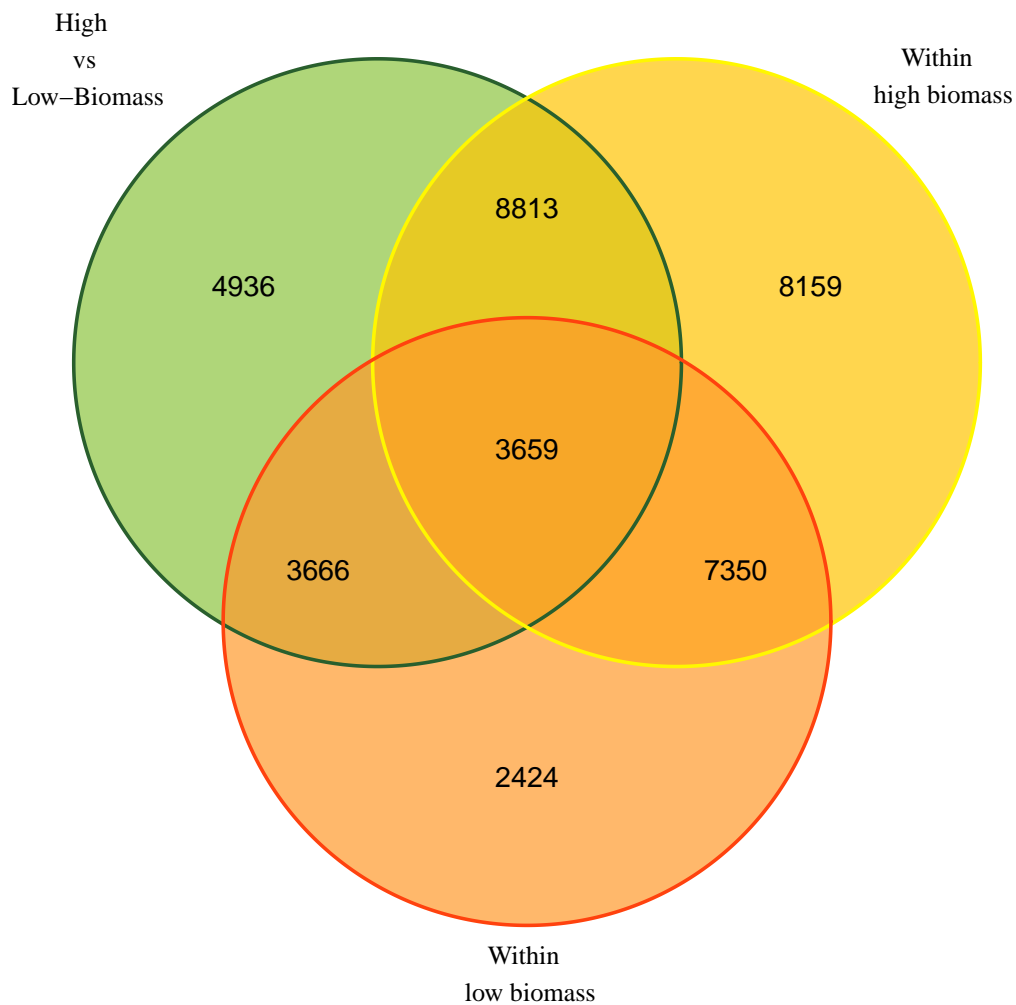

Figure 2: Venn diagram of the overlap between lists of differentially expressed genes in the three tests.

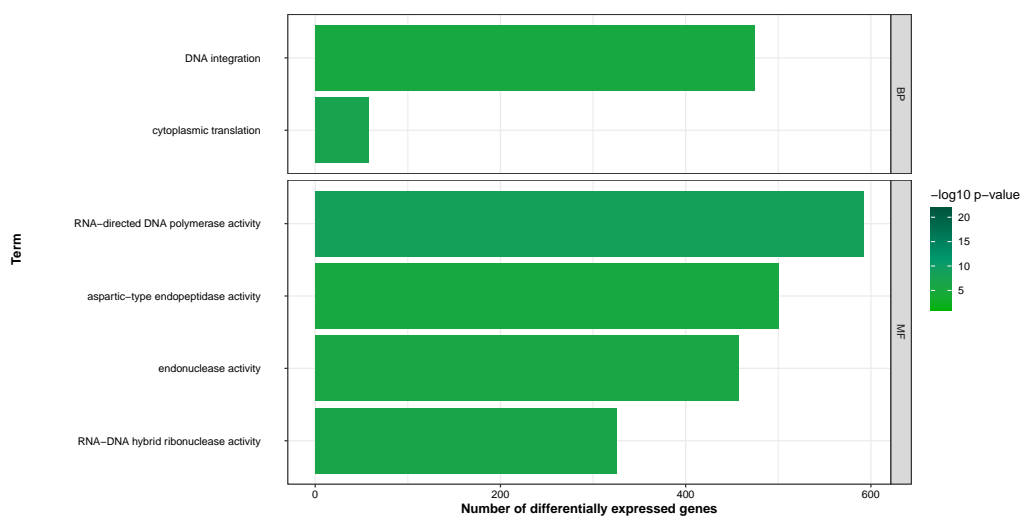

Figure 3: Bar chart of the number of DEGs in each enriched functional class for the biomass group contrast. Gene ontology categories are indicated by BP (Biological Process), CC (Cellular Component) and MF (Molecular Function).

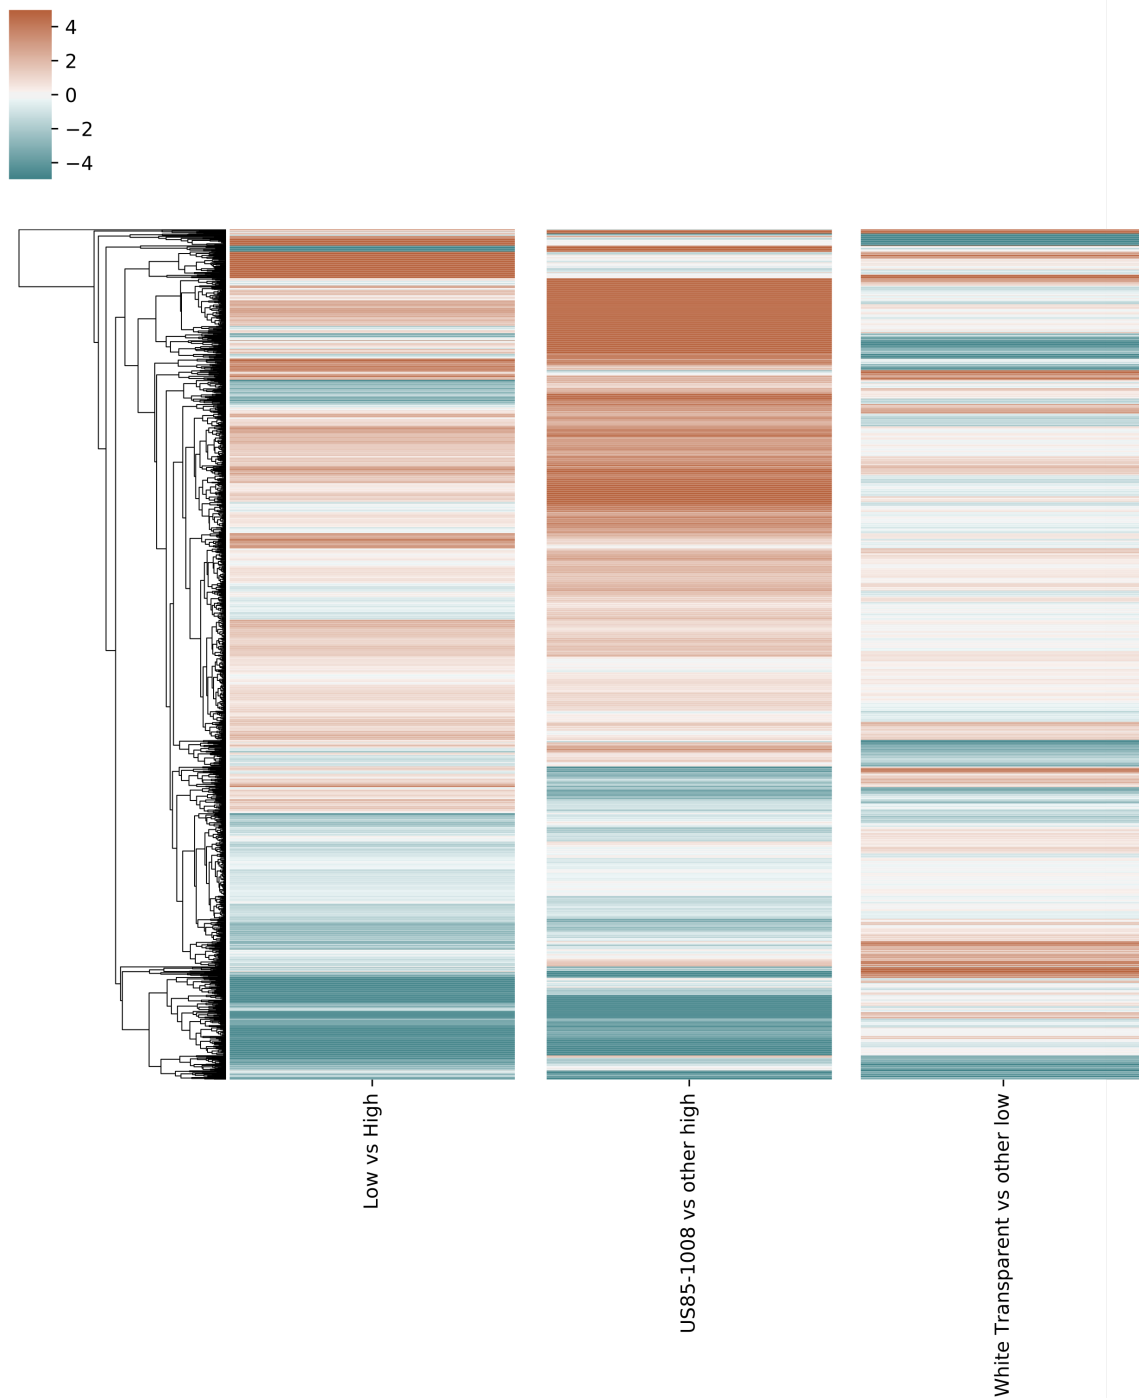

Figure 4: **Heatmap of differential expression for genes associated with transposition.** Each column in the heatmap represent the genes fold changes according to a contrast: (i) *Low vs High* is the comparison between the low biomass to the high biomass group; (ii) *US85-1008 vs other high* represents the comparison of US85-1008 to wild high-fiber canes; (iii) *White Transparent vs other low* is the contrast of White Transparent against the low-fiber hybrids.

Using the common DEGs among the three contrast, the enrichment corroborates differences in stress response and transposition (Figure 5). To avoid the enrichment of these often apparent terms, we performed a functional enrichment analyses using the common genes between the high and low groups contrasts, removing those common to the fiber contrast. With that we verified that sugarcane genotypes, even in a same phenotypic group, have differences in the cell wall biogenesis (Figure 6).

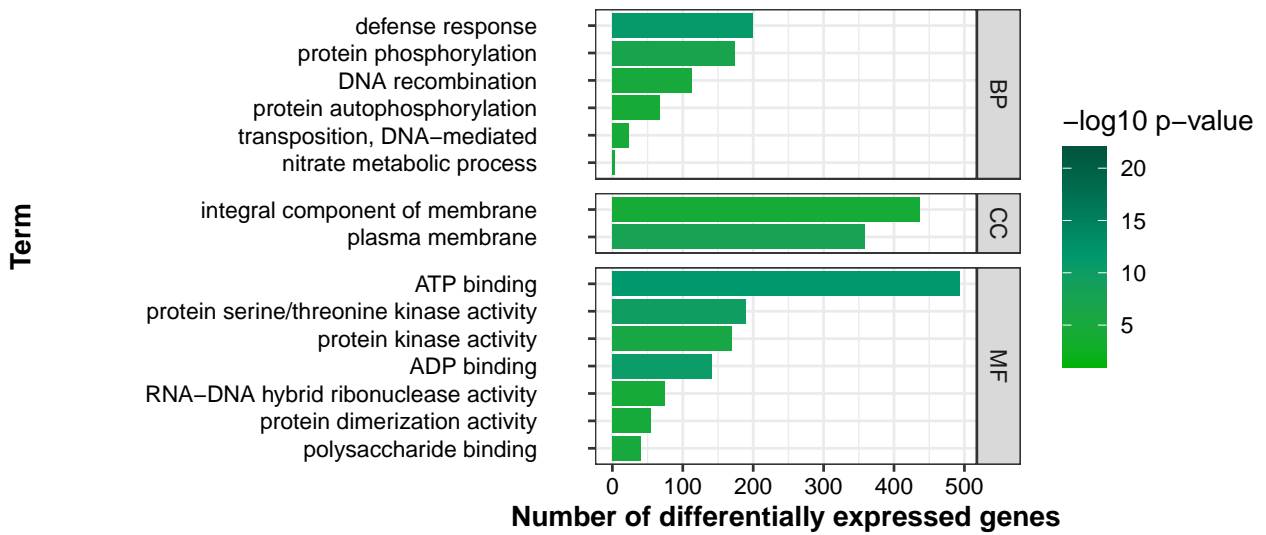

Figure 5: Bar chart of the number of DEGs in each category enriched with common DEGs between the three contrasts. Gene ontology categories are indicated by BP (Biological Process), CC (Cellular Component) and MF (Molecular Function)

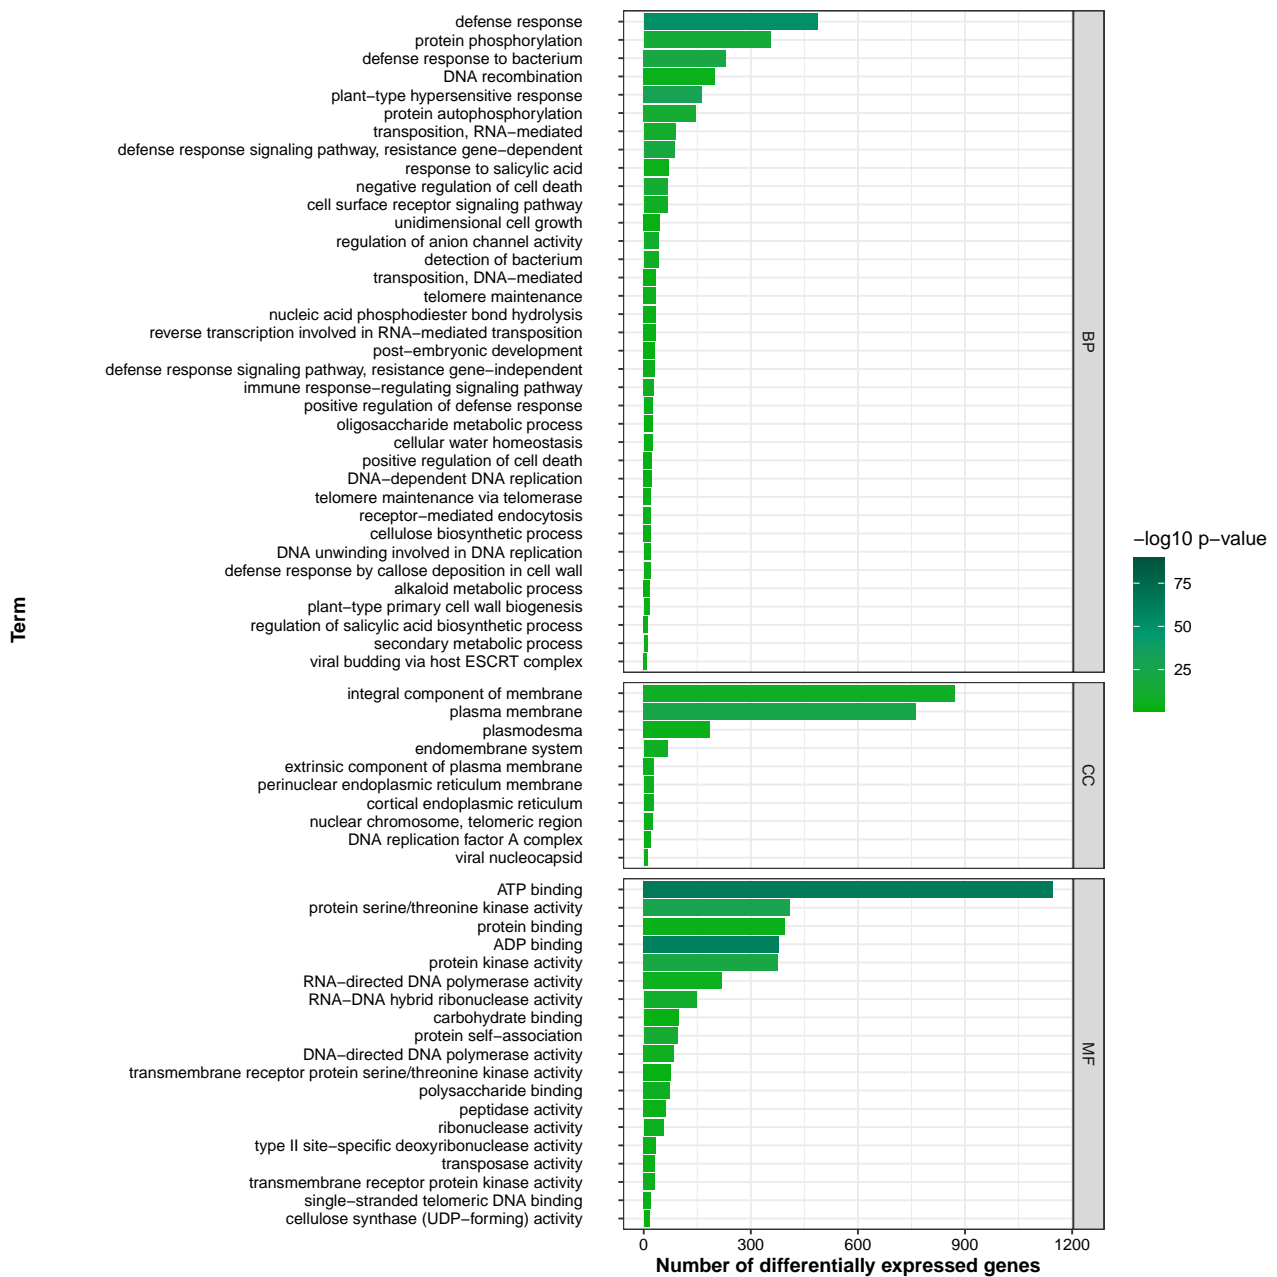

Figure 6: Bar chart of the number of DEGs in each category enriched with common DEGs between the contrasts comparing genotypes within the groups. Gene ontology categories are indicated by BP (Biological Process), CC (Cellular Component) and MF (Molecular Function)

### 3 Co-expression enrichment

Our co-expression network was built with the genes passing the expression filter. We obtained 16 modules, of which eleven showed enrichment of 289 Gene Ontology terms. Table 3 presents the Gene Ontology terms enriched in each co-expression module.

Table 3: Gene Ontology terms enriched in each co-expression module.

| Module   | Category   | Overrepresented p-value | Term                                                                         |
|----------|------------|-------------------------|------------------------------------------------------------------------------|
| Module 1 | GO:0003735 | 0.000000000             | structural constituent of ribosome                                           |
|          | GO:0006412 | 0.000000000             | translation                                                                  |
|          | GO:0002181 | 0.000000000             | cytoplasmic translation                                                      |
|          | GO:0005840 | 0.000000000             | ribosome                                                                     |
|          | GO:0022625 | 0.000000000             | cytosolic large ribosomal subunit                                            |
|          | GO:0005829 | 0.000000000             | cytosol                                                                      |
|          | GO:0005622 | 0.000000000             | intracellular                                                                |
|          | GO:0033290 | 0.000000000             | eukaryotic 48S preinitiation complex                                         |
|          | GO:0022627 | 0.000000000             | cytosolic small ribosomal subunit                                            |
|          | GO:0005759 | 0.000000000             | mitochondrial matrix                                                         |
|          | GO:0001732 | 0.000000001             | formation of cytoplasmic translation initiation complex                      |
|          | GO:0016282 | 0.000000001             | eukaryotic 43S preinitiation complex                                         |
|          | GO:0043161 | 0.000000003             | proteasome-mediated ubiquitin-dependent protein catabolic process            |
|          | GO:0055114 | 0.000000004             | oxidation-reduction process                                                  |
|          | GO:0006099 | 0.000000018             | tricarboxylic acid cycle                                                     |
|          | GO:0032153 | 0.000000021             | cell division site                                                           |
|          | GO:0005747 | 0.000000058             | mitochondrial respiratory chain complex I                                    |
|          | GO:0005852 | 0.000000130             | eukaryotic translation initiation factor 3 complex                           |
|          | GO:0030479 | 0.000000316             | actin cortical patch                                                         |
|          | GO:0003743 | 0.000000329             | translation initiation factor activity                                       |
|          | GO:0045842 | 0.000000637             | positive regulation of mitotic metaphase/anaphase transition                 |
|          | GO:0005737 | 0.000000841             | cytoplasm                                                                    |
|          | GO:0000329 | 0.000001102             | fungal-type vacuole membrane                                                 |
|          | GO:0006696 | 0.000001155             | ergosterol biosynthetic process                                              |
|          | GO:0005839 | 0.000003294             | proteasome core complex                                                      |
|          | GO:0004298 | 0.000003823             | threonine-type endopeptidase activity                                        |
|          | GO:0016491 | 0.000004003             | oxidoreductase activity                                                      |
|          | GO:0043066 | 0.000004081             | negative regulation of apoptotic process                                     |
|          | GO:0010498 | 0.000004696             | proteasomal protein catabolic process                                        |
|          | GO:0006413 | 0.000005148             | translational initiation                                                     |
|          | GO:0000502 | 0.000006289             | proteasome complex                                                           |
|          | GO:0002183 | 0.000007142             | cytoplasmic translational initiation                                         |
|          | GO:0000272 | 0.000008485             | polysaccharide catabolic process                                             |
|          | GO:0005838 | 0.000009464             | proteasome regulatory particle                                               |
|          | GO:0015986 | 0.000010074             | ATP synthesis coupled proton transport                                       |
|          | GO:0032543 | 0.000010163             | mitochondrial translation                                                    |
|          | GO:0010499 | 0.000012071             | proteasomal ubiquitin-independent protein catabolic process                  |
|          | GO:0000276 | 0.000014544             | mitochondrial proton-transporting ATP synthase complex, coupling factor F(o) |
|          | GO:0006457 | 0.000015568             | protein folding                                                              |
|          | GO:0006048 | 0.000015596             | UDP-N-acetylglucosamine biosynthetic process                                 |
|          | GO:0051082 | 0.000018026             | unfolded protein binding                                                     |

Table 3: Gene Ontology terms enriched in each co-expression module.

| Module   | Category   | Overrepresented p-value | Term                                                                                    |
|----------|------------|-------------------------|-----------------------------------------------------------------------------------------|
|          | GO:0034622 | 0.000023142             | cellular macromolecular complex assembly                                                |
|          | GO:0008540 | 0.000026175             | proteasome regulatory particle, base sub-complex                                        |
|          | GO:0022624 | 0.000029125             | proteasome accessory complex                                                            |
|          | GO:0006120 | 0.000032853             | mitochondrial electron transport, NADH to ubiquinone                                    |
|          | GO:0004175 | 0.000036743             | endopeptidase activity                                                                  |
|          | GO:0005743 | 0.000042846             | mitochondrial inner membrane                                                            |
|          | GO:0036402 | 0.000050085             | proteasome-activating ATPase activity                                                   |
|          | GO:0004099 | 0.000058786             | chitin deacetylase activity                                                             |
|          | GO:0006119 | 0.000066176             | oxidative phosphorylation                                                               |
|          | GO:0000921 | 0.000068492             | septin ring assembly                                                                    |
|          | GO:0031105 | 0.000068492             | septin complex                                                                          |
|          | GO:0032160 | 0.000068492             | septin filament array                                                                   |
|          | GO:1903475 | 0.000073496             | mitotic actomyosin contractile ring assembly                                            |
|          | GO:0006620 | 0.000075607             | posttranslational protein targeting to endoplasmic reticulum membrane                   |
|          | GO:0009405 | 0.000076071             | pathogenesis                                                                            |
|          | GO:0015934 | 0.000076610             | large ribosomal subunit                                                                 |
|          | GO:0000001 | 0.000077394             | mitochondrion inheritance                                                               |
|          | GO:0009062 | 0.000077940             | fatty acid catabolic process                                                            |
|          | GO:0004129 | 0.000087082             | cytochrome-c oxidase activity                                                           |
|          | GO:0030544 | 0.000101316             | Hsp70 protein binding                                                                   |
|          | GO:0031072 | 0.000108075             | heat shock protein binding                                                              |
|          | GO:0005686 | 0.000113360             | U2 snRNP                                                                                |
|          | GO:0019878 | 0.000116452             | lysine biosynthetic process via aminoadipic acid                                        |
|          | GO:0045899 | 0.000122924             | positive regulation of RNA polymerase II transcriptional preinitiation complex assembly |
|          | GO:0030234 | 0.000130228             | enzyme regulator activity                                                               |
|          | GO:0099132 | 0.000131513             | ATP hydrolysis coupled cation transmembrane transport                                   |
|          | GO:0031204 | 0.000133465             | posttranslational protein targeting to membrane, translocation                          |
|          | GO:0042254 | 0.000149007             | ribosome biogenesis                                                                     |
|          | GO:0005685 | 0.000154174             | U1 snRNP                                                                                |
|          | GO:0034515 | 0.000164803             | proteasome storage granule                                                              |
|          | GO:0043248 | 0.000169156             | proteasome assembly                                                                     |
|          | GO:0000027 | 0.000183653             | ribosomal large subunit assembly                                                        |
|          | GO:0000050 | 0.000193815             | urea cycle                                                                              |
|          | GO:0004753 | 0.000203954             | saccharopine dehydrogenase activity                                                     |
|          | GO:0000028 | 0.000222564             | ribosomal small subunit assembly                                                        |
|          | GO:0042788 | 0.000259576             | polysomal ribosome                                                                      |
|          | GO:0005940 | 0.000324330             | septin ring                                                                             |
|          | GO:0007264 | 0.000369241             | small GTPase mediated signal transduction                                               |
|          | GO:0008541 | 0.000389399             | proteasome regulatory particle, lid subcomplex                                          |
|          | GO:0006032 | 0.000410471             | chitin catabolic process                                                                |
| Module 2 | GO:0043531 | 0.000004750             | ADP binding                                                                             |
| Module 3 | GO:0000943 | 0.000000001             | retrotransposon nucleocapsid                                                            |
|          | GO:0008270 | 0.000000001             | zinc ion binding                                                                        |
|          | GO:0009507 | 0.000000003             | chloroplast                                                                             |
|          | GO:0009451 | 0.000000006             | RNA modification                                                                        |



Table 3: Gene Ontology terms enriched in each co-expression module.

| Module   | Category   | Overrepresented p-value | Term                                                                                                                                                |
|----------|------------|-------------------------|-----------------------------------------------------------------------------------------------------------------------------------------------------|
|          | GO:0015074 | 0.000000012             | DNA integration                                                                                                                                     |
|          | GO:0004519 | 0.000000056             | endonuclease activity                                                                                                                               |
|          | GO:0003964 | 0.000000066             | RNA-directed DNA polymerase activity                                                                                                                |
|          | GO:0004190 | 0.000000083             | aspartic-type endopeptidase activity                                                                                                                |
|          | GO:0003676 | 0.000002277             | nucleic acid binding                                                                                                                                |
|          | GO:0006310 | 0.000003950             | DNA recombination                                                                                                                                   |
|          | GO:0009570 | 0.000027960             | chloroplast stroma                                                                                                                                  |
|          | GO:0007004 | 0.000049015             | telomere maintenance via telomerase                                                                                                                 |
|          | GO:0006261 | 0.000050414             | DNA-dependent DNA replication                                                                                                                       |
| Module 4 | GO:0043531 | 0.000000300             | ADP binding                                                                                                                                         |
|          | GO:0047268 | 0.000001561             | galactinol-raffinose galactosyltransferase activity                                                                                                 |
| Module 7 | GO:0003735 | 0.000000000             | structural constituent of ribosome                                                                                                                  |
|          | GO:0005730 | 0.000000000             | nucleolus                                                                                                                                           |
|          | GO:0006412 | 0.000000000             | translation                                                                                                                                         |
|          | GO:0005840 | 0.000000000             | ribosome                                                                                                                                            |
|          | GO:0006364 | 0.000000000             | rRNA processing                                                                                                                                     |
|          | GO:0022625 | 0.000000000             | cytosolic large ribosomal subunit                                                                                                                   |
|          | GO:0003723 | 0.000000000             | RNA binding                                                                                                                                         |
|          | GO:0022627 | 0.000000000             | cytosolic small ribosomal subunit                                                                                                                   |
|          | GO:0005622 | 0.000000000             | intracellular                                                                                                                                       |
|          | GO:0005739 | 0.000000000             | mitochondrion                                                                                                                                       |
|          | GO:0032040 | 0.000000000             | small-subunit processome                                                                                                                            |
|          | GO:0005829 | 0.000000000             | cytosol                                                                                                                                             |
|          | GO:0019843 | 0.000000000             | rRNA binding                                                                                                                                        |
|          | GO:0022626 | 0.000000000             | cytosolic ribosome                                                                                                                                  |
|          | GO:0042254 | 0.000000000             | ribosome biogenesis                                                                                                                                 |
|          | GO:0000462 | 0.000000000             | maturation of SSU-rRNA from tricistronic rRNA transcript (SSU-rRNA, 5.8S rRNA, LSU-rRNA)                                                            |
|          | GO:0000027 | 0.000000000             | ribosomal large subunit assembly                                                                                                                    |
|          | GO:0042273 | 0.000000000             | ribosomal large subunit biogenesis                                                                                                                  |
|          | GO:0000447 | 0.000000001             | endonucleolytic cleavage in ITS1 to separate SSU-rRNA from 5.8S rRNA and LSU-rRNA from tricistronic rRNA transcript (SSU-rRNA, 5.8S rRNA, LSU-rRNA) |
|          | GO:0000480 | 0.000000001             | endonucleolytic cleavage in 5'-ETS of tricistronic rRNA transcript (SSU-rRNA, 5.8S rRNA, LSU-rRNA)                                                  |
|          | GO:0051082 | 0.000000003             | unfolded protein binding                                                                                                                            |
|          | GO:0006457 | 0.000000007             | protein folding                                                                                                                                     |
|          | GO:0000028 | 0.000000026             | ribosomal small subunit assembly                                                                                                                    |
|          | GO:0000472 | 0.000000026             | endonucleolytic cleavage to generate mature 5'-end of SSU-rRNA from (SSU-rRNA, 5.8S rRNA, LSU-rRNA)                                                 |
|          | GO:0008033 | 0.000000040             | tRNA processing                                                                                                                                     |
|          | GO:0030515 | 0.000000044             | snoRNA binding                                                                                                                                      |
|          | GO:0006397 | 0.000000068             | mRNA processing                                                                                                                                     |
|          | GO:0003729 | 0.000000119             | mRNA binding                                                                                                                                        |
|          | GO:0031167 | 0.000000226             | rRNA methylation                                                                                                                                    |
|          | GO:0017056 | 0.000000229             | structural constituent of nuclear pore                                                                                                              |
|          | GO:0006414 | 0.000000286             | translational elongation                                                                                                                            |
|          | GO:0030687 | 0.000000873             | preribosome, large subunit precursor                                                                                                                |
|          | GO:0009408 | 0.000001166             | response to heat                                                                                                                                    |

Table 3: Gene Ontology terms enriched in each co-expression module.

| Module | Category   | Overrepresented p-value | Term                                                                                     |
|--------|------------|-------------------------|------------------------------------------------------------------------------------------|
|        | GO:0000049 | 0.000001168             | tRNA binding                                                                             |
|        | GO:0000463 | 0.000001366             | maturation of LSU-rRNA from tricistronic rRNA transcript (SSU-rRNA, 5.8S rRNA, LSU-rRNA) |
|        | GO:1990904 | 0.000001859             | ribonucleoprotein complex                                                                |
|        | GO:0006606 | 0.000002675             | protein import into nucleus                                                              |
|        | GO:0034388 | 0.000003248             | Pwp2p-containing subcomplex of 90S preribosome                                           |
|        | GO:0019919 | 0.000004851             | peptidyl-arginine methylation, to asymmetrical-dimethyl arginine                         |
|        | GO:0000338 | 0.000005375             | protein deneddylation                                                                    |
|        | GO:0030686 | 0.000005630             | 90S preribosome                                                                          |
|        | GO:0000055 | 0.000006631             | ribosomal large subunit export from nucleus                                              |
|        | GO:0009507 | 0.000006957             | chloroplast                                                                              |
|        | GO:0005762 | 0.000008474             | mitochondrial large ribosomal subunit                                                    |
|        | GO:0035242 | 0.000008551             | protein-arginine omega-N asymmetric methyltransferase activity                           |
|        | GO:0005654 | 0.000009141             | nucleoplasm                                                                              |
|        | GO:0008180 | 0.000010412             | COP9 signalosome                                                                         |
|        | GO:0031429 | 0.000010913             | box H/ACA snoRNP complex                                                                 |
|        | GO:0005682 | 0.000011762             | U5 snRNP                                                                                 |
|        | GO:0034513 | 0.000014963             | box H/ACA snoRNA binding                                                                 |
|        | GO:0003899 | 0.000015136             | DNA-directed 5'-3' RNA polymerase activity                                               |
|        | GO:0016282 | 0.000016113             | eukaryotic 43S preinitiation complex                                                     |
|        | GO:0006413 | 0.000016417             | translational initiation                                                                 |
|        | GO:0008168 | 0.000017298             | methyltransferase activity                                                               |
|        | GO:0005681 | 0.000020908             | spliceosomal complex                                                                     |
|        | GO:0004812 | 0.000020909             | aminoacyl-tRNA ligase activity                                                           |
|        | GO:0042788 | 0.000021288             | polysomal ribosome                                                                       |
|        | GO:0034336 | 0.000021974             | misfolded RNA binding                                                                    |
|        | GO:0060567 | 0.000021974             | negative regulation of DNA-templated transcription, termination                          |
|        | GO:0008469 | 0.000022216             | histone-arginine N-methyltransferase activity                                            |
|        | GO:0034969 | 0.000022216             | histone arginine methylation                                                             |
|        | GO:0003743 | 0.000026370             | translation initiation factor activity                                                   |
|        | GO:0006396 | 0.000026802             | RNA processing                                                                           |
|        | GO:0016554 | 0.000039355             | cytidine to uridine editing                                                              |
|        | GO:0000176 | 0.000042088             | nuclear exosome (RNase complex)                                                          |
|        | GO:0004386 | 0.000042349             | helicase activity                                                                        |
|        | GO:0032543 | 0.000057521             | mitochondrial translation                                                                |
|        | GO:0001732 | 0.000061808             | formation of cytoplasmic translation initiation complex                                  |
|        | GO:0000398 | 0.000076151             | mRNA splicing, via spliceosome                                                           |
|        | GO:0030488 | 0.000089460             | tRNA methylation                                                                         |
|        | GO:0051117 | 0.000123216             | ATPase binding                                                                           |
|        | GO:0009536 | 0.000144513             | plastid                                                                                  |
|        | GO:0034511 | 0.000169454             | U3 snoRNA binding                                                                        |
|        | GO:0032955 | 0.000200647             | regulation of division septum assembly                                                   |
|        | GO:0033290 | 0.000208091             | eukaryotic 48S preinitiation complex                                                     |
|        | GO:0005736 | 0.000233738             | DNA-directed RNA polymerase I complex                                                    |
|        | GO:0042134 | 0.000243525             | rRNA primary transcript binding                                                          |
|        | GO:0051028 | 0.000251357             | mRNA transport                                                                           |
|        | GO:0000469 | 0.000257832             | cleavage involved in rRNA processing                                                     |

Table 3: Gene Ontology terms enriched in each co-expression module.

| Module    | Category   | Overrepresented p-value | Term                                                                                    |
|-----------|------------|-------------------------|-----------------------------------------------------------------------------------------|
|           | GO:0005832 | 0.000258810             | chaperonin-containing T-complex                                                         |
|           | GO:0006418 | 0.000300001             | tRNA aminoacylation for protein translation                                             |
|           | GO:0003871 | 0.000302662             | 5-methyltetrahydropteroyltriglutamate-homocysteine S-methyltransferase activity         |
|           | GO:0010157 | 0.000325097             | response to chlorate                                                                    |
|           | GO:0004328 | 0.000335979             | formamidase activity                                                                    |
|           | GO:0006383 | 0.000337829             | transcription from RNA polymerase III promoter                                          |
|           | GO:0030295 | 0.000367275             | protein kinase activator activity                                                       |
|           | GO:0009295 | 0.000368216             | nucleoid                                                                                |
|           | GO:0031118 | 0.000385301             | rRNA pseudouridine synthesis                                                            |
|           | GO:0016811 | 0.000392026             | hydrolase activity, acting on carbon-nitrogen (but not peptide) bonds, in linear amides |
|           | GO:0070181 | 0.000408561             | small ribosomal subunit rRNA binding                                                    |
|           | GO:0005732 | 0.000425031             | small nucleolar ribonucleoprotein complex                                               |
|           | GO:0043021 | 0.000440732             | ribonucleoprotein complex binding                                                       |
|           | GO:0009631 | 0.000445880             | cold acclimation                                                                        |
|           | GO:0031428 | 0.000447993             | box C/D snoRNP complex                                                                  |
|           | GO:0080156 | 0.000473193             | mitochondrial mRNA modification                                                         |
|           | GO:0005635 | 0.000489425             | nuclear envelope                                                                        |
|           | GO:0006360 | 0.000499518             | transcription from RNA polymerase I promoter                                            |
| Module 8  | GO:0003964 | 0.000000000             | RNA-directed DNA polymerase activity                                                    |
|           | GO:0015074 | 0.000000000             | DNA integration                                                                         |
|           | GO:0004190 | 0.000000000             | aspartic-type endopeptidase activity                                                    |
|           | GO:0006310 | 0.000000000             | DNA recombination                                                                       |
|           | GO:0003887 | 0.000000000             | DNA-directed DNA polymerase activity                                                    |
|           | GO:0004519 | 0.000000000             | endonuclease activity                                                                   |
|           | GO:0009507 | 0.000000000             | chloroplast                                                                             |
|           | GO:0000943 | 0.000000000             | retrotransposon nucleocapsid                                                            |
|           | GO:0003676 | 0.000000000             | nucleic acid binding                                                                    |
|           | GO:0004523 | 0.000000000             | RNA-DNA hybrid ribonuclease activity                                                    |
|           | GO:0032197 | 0.000000000             | transposition, RNA-mediated                                                             |
|           | GO:0004540 | 0.000000000             | ribonuclease activity                                                                   |
|           | GO:0008233 | 0.000000000             | peptidase activity                                                                      |
|           | GO:0009570 | 0.000000000             | chloroplast stroma                                                                      |
|           | GO:0003723 | 0.000000000             | RNA binding                                                                             |
|           | GO:0008270 | 0.000000000             | zinc ion binding                                                                        |
|           | GO:0009941 | 0.000000002             | chloroplast envelope                                                                    |
|           | GO:0046872 | 0.000001134             | metal ion binding                                                                       |
|           | GO:0006313 | 0.000007897             | transposition, DNA-mediated                                                             |
|           | GO:0009535 | 0.000014685             | chloroplast thylakoid membrane                                                          |
|           | GO:0004803 | 0.000016409             | transposase activity                                                                    |
| Module 9  | GO:0006310 | 0.000000003             | DNA recombination                                                                       |
|           | GO:0003964 | 0.000000007             | RNA-directed DNA polymerase activity                                                    |
|           | GO:0004519 | 0.000000137             | endonuclease activity                                                                   |
|           | GO:0006468 | 0.000002684             | protein phosphorylation                                                                 |
|           | GO:0046872 | 0.000005693             | metal ion binding                                                                       |
|           | GO:0004674 | 0.000021446             | protein serine/threonine kinase activity                                                |
| Module 10 | GO:0016021 | 0.000000000             | integral component of membrane                                                          |
|           | GO:0006355 | 0.000000001             | regulation of transcription, DNA-templated                                              |
|           | GO:0005515 | 0.000000002             | protein binding                                                                         |
|           | GO:0003700 | 0.000000033             | DNA binding transcription factor activity                                               |

Table 3: Gene Ontology terms enriched in each co-expression module.

| Module    | Category   | Overrepresented p-value | Term                                                             |
|-----------|------------|-------------------------|------------------------------------------------------------------|
|           | GO:0006970 | 0.000000277             | response to osmotic stress                                       |
|           | GO:0005794 | 0.000001711             | Golgi apparatus                                                  |
|           | GO:0005886 | 0.000002640             | plasma membrane                                                  |
|           | GO:0016020 | 0.000006302             | membrane                                                         |
|           | GO:0043565 | 0.000006311             | sequence-specific DNA binding                                    |
|           | GO:0007275 | 0.000007709             | multicellular organism development                               |
|           | GO:0042285 | 0.000027768             | xylosyltransferase activity                                      |
|           | GO:0072583 | 0.000031484             | clathrin-dependent endocytosis                                   |
|           | GO:0006468 | 0.000040283             | protein phosphorylation                                          |
|           | GO:0015031 | 0.000043071             | protein transport                                                |
| Module 11 | GO:0043531 | 0.000000000             | ADP binding                                                      |
|           | GO:0009626 | 0.000000000             | plant-type hypersensitive response                               |
|           | GO:0005524 | 0.000000010             | ATP binding                                                      |
|           | GO:0009870 | 0.000000061             | defense response signaling pathway, resistance gene-dependent    |
|           | GO:0006952 | 0.000000321             | defense response                                                 |
|           | GO:0060548 | 0.000003589             | negative regulation of cell death                                |
|           | GO:0009507 | 0.000005396             | chloroplast                                                      |
|           | GO:0033201 | 0.000012063             | alpha-1,4-glucan synthase activity                               |
|           | GO:0009535 | 0.000015676             | chloroplast thylakoid membrane                                   |
|           | GO:0009011 | 0.000022960             | starch synthase activity                                         |
| Module 12 | GO:0005886 | 0.000000001             | plasma membrane                                                  |
|           | GO:0006952 | 0.000000001             | defense response                                                 |
|           | GO:0043531 | 0.000000004             | ADP binding                                                      |
|           | GO:0016021 | 0.000000171             | integral component of membrane                                   |
| Module 16 | GO:0009535 | 0.000000000             | chloroplast thylakoid membrane                                   |
|           | GO:0015979 | 0.000000000             | photosynthesis                                                   |
|           | GO:0009522 | 0.000000000             | photosystem I                                                    |
|           | GO:0009507 | 0.000000000             | chloroplast                                                      |
|           | GO:0018298 | 0.000000000             | protein-chromophore linkage                                      |
|           | GO:0009523 | 0.000000000             | photosystem II                                                   |
|           | GO:0009538 | 0.000000007             | photosystem I reaction center                                    |
|           | GO:0016168 | 0.000000024             | chlorophyll binding                                              |
|           | GO:0009739 | 0.000000078             | response to gibberellin                                          |
|           | GO:0009789 | 0.000000085             | positive regulation of abscisic acid-activated signaling pathway |
|           | GO:0010598 | 0.000000126             | NAD(P)H dehydrogenase complex (plastoquinone)                    |
|           | GO:0003700 | 0.000000241             | DNA binding transcription factor activity                        |
|           | GO:0009772 | 0.000000342             | photosynthetic electron transport in photosystem II              |
|           | GO:0070413 | 0.000000400             | trehalose metabolism in response to stress                       |
|           | GO:0009723 | 0.000000422             | response to ethylene                                             |
|           | GO:0009416 | 0.000000441             | response to light stimulus                                       |
|           | GO:0010319 | 0.000001268             | stromule                                                         |
|           | GO:0009767 | 0.000001277             | photosynthetic electron transport chain                          |
|           | GO:0010287 | 0.000001283             | plastoglobule                                                    |
|           | GO:0042651 | 0.000001324             | thylakoid membrane                                               |
|           | GO:0007623 | 0.000001819             | circadian rhythm                                                 |
|           | GO:0009768 | 0.000002043             | photosynthesis, light harvesting in photosystem I                |
|           | GO:0009773 | 0.000002071             | photosynthetic electron transport in photosystem I               |

Table 3: Gene Ontology terms enriched in each co-expression module.

| Module | Category   | Overrepresented p-value | Term                                                          |
|--------|------------|-------------------------|---------------------------------------------------------------|
|        | GO:0090229 | 0.000002188             | negative regulation of red or far-red light signaling pathway |
|        | GO:0009409 | 0.000006625             | response to cold                                              |
|        | GO:0006355 | 0.000012645             | regulation of transcription, DNA-templated                    |
|        | GO:0005992 | 0.000012767             | trehalose biosynthetic process                                |
|        | GO:0009737 | 0.000019672             | response to abscisic acid                                     |
|        | GO:0009640 | 0.000019796             | photomorphogenesis                                            |
|        | GO:0046524 | 0.000021765             | sucrose-phosphate synthase activity                           |
|        | GO:0048038 | 0.000029880             | quinone binding                                               |
|        | GO:0031969 | 0.000039092             | chloroplast membrane                                          |
|        | GO:0009882 | 0.000041604             | blue light photoreceptor activity                             |
|        | GO:0009579 | 0.000043182             | thylakoid                                                     |
|        | GO:0080006 | 0.000129885             | internode patterning                                          |
|        | GO:0009941 | 0.000136129             | chloroplast envelope                                          |
|        | GO:0016311 | 0.000137838             | dephosphorylation                                             |
|        | GO:1902448 | 0.000173188             | positive regulation of shade avoidance                        |
|        | GO:0009735 | 0.000176429             | response to cytokinin                                         |
|        | GO:0019684 | 0.000211381             | photosynthesis, light reaction                                |

We created a Word Cloud representation using a word frequency greater than one in each enriched module to check the most common words (Figure 7).

We used the Gene Set Enrichment Analysis (GSEA) and permuted the genes of the modules 10,000 times in the ranked LFC lists of the following contrasts: i) Low against high biomass; ii) US85-1008 compared to the mean of SES205A and IN84-58; iii) White Transparent compared to the mean of RB72454 and SP80-3280. We found that module 16 was enriched with genes with high absolute LFC values in the three contrasts (Figure 9). Genes in module 16 were positively correlated with genes of high LFC in the biomass contrast and in the comparison of US85-1008 with two *S. spontaneum* genotypes. Ranked genes from the contrast comparing the *S. officinarum* White Transparent to the hybrids were negatively correlated with genes within module 16 .

To visualize the expression profile of each module, we assessed the expression level of the eigengenes (Figure 10). We observed that at least five modules were marked by a expression peak or valley for a single genotype. Module 16 contains genes with higher expression in sucrose-rich genotypes, opposite to module 3. In both cases US85-1008 was in the high expression group. The profile of the eigengene of Module 16 indicates a higher expression in the low biomass group, but without a substantial variability among the samples within the group. According to the GSEA, in this module the low-biomass genotypes did not contain genes with high LFC.

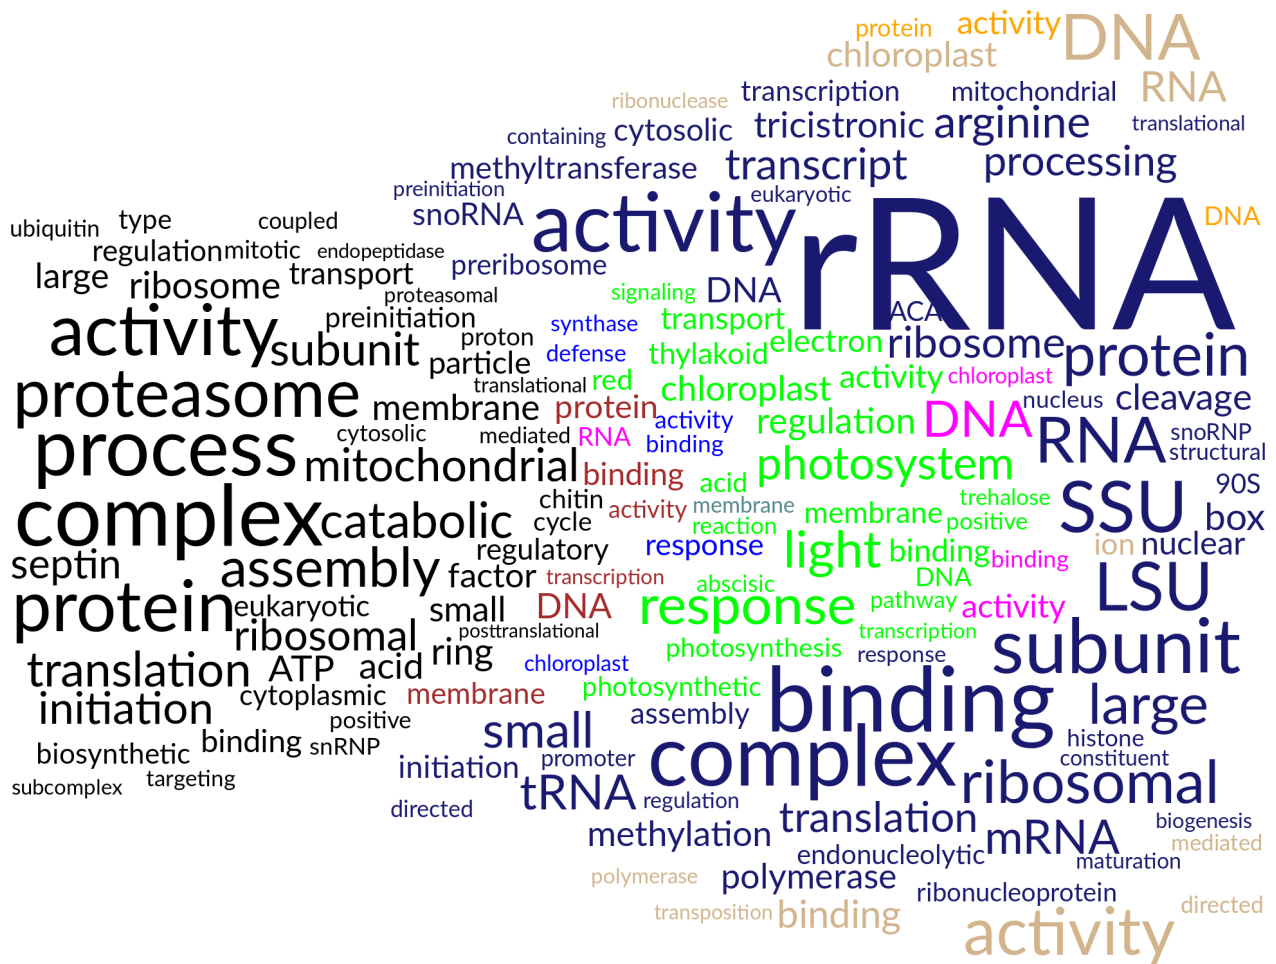

Module    a    Module 1    a    Module 11    a    Module 16    a    Module 7    a    Module 9  
              a    Module 10    a    Module 12    a    Module 3    a    Module 8

Figure 7: Word cloud using Gene Ontology descriptions for terms enriched with genes in the co-expression modules. This image is restricted to present only nine modules, those that presented enriched GO terms.

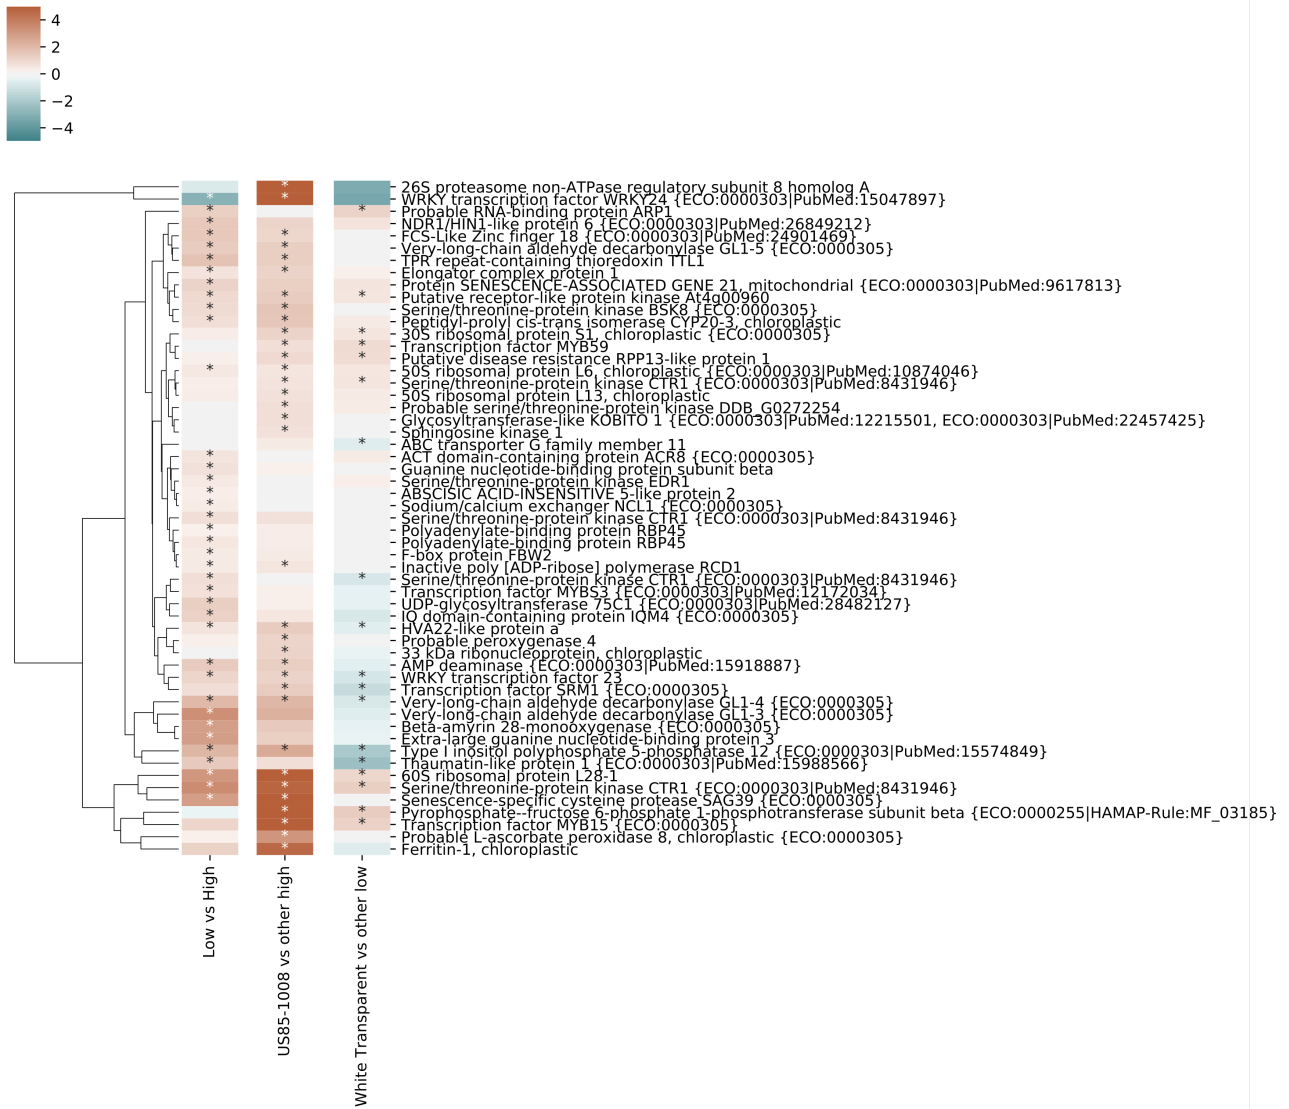

Figure 8: **Expression of hormone response DEGs present in the co-expression module 16** These genes were functionally annotated to the biological processes of responses to abscisic acid, cytokinin, ethylene or gibberellin. Each column in the heatmap represent the genes fold changes according to a contrast: (i) *Low vs High* is the comparison between the low biomass to the high biomass group; (ii) *US85-1008 vs other high* represents the comparison of US85-1008 to wild high-fiber canes; (iii) *White Transparent vs other low* is the contrast of White Transparent against the low-fiber hybrids. Significantly differentially expressed genes are indicated by asterisks.

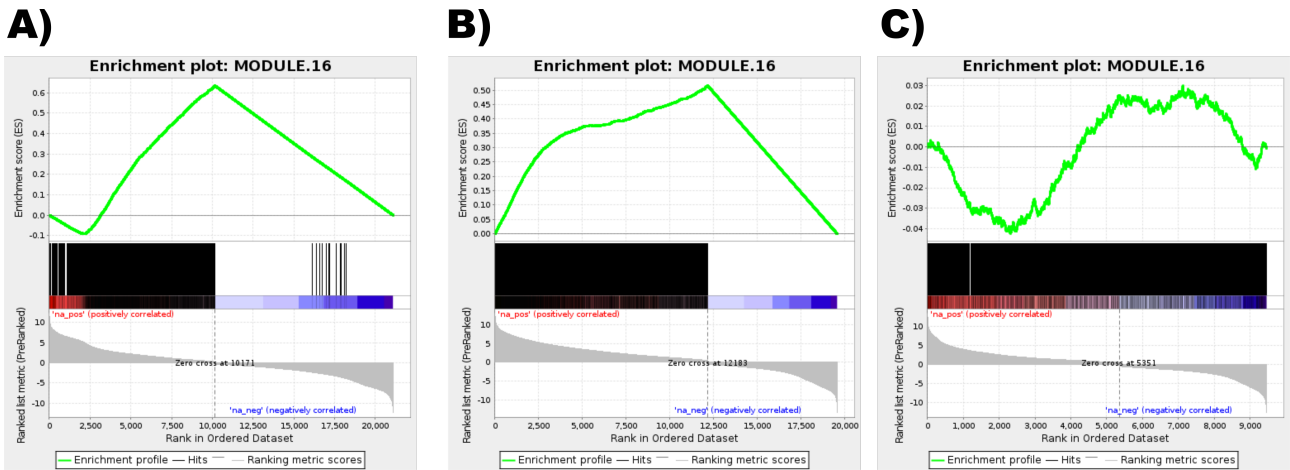

Figure 9: **Gene Set Enrichment of the Module 16 co-expressed genes** Gene set enrichment using genes ranked based on absolute LFC. (A) Low-fiber genotypes contrasted to the high-fiber group. (B) US85-1008 contrasted to the mean of SES205A and IN84-58. (C) White Transparent compared to the mean of the hybrids RB72454 and SP80-3280

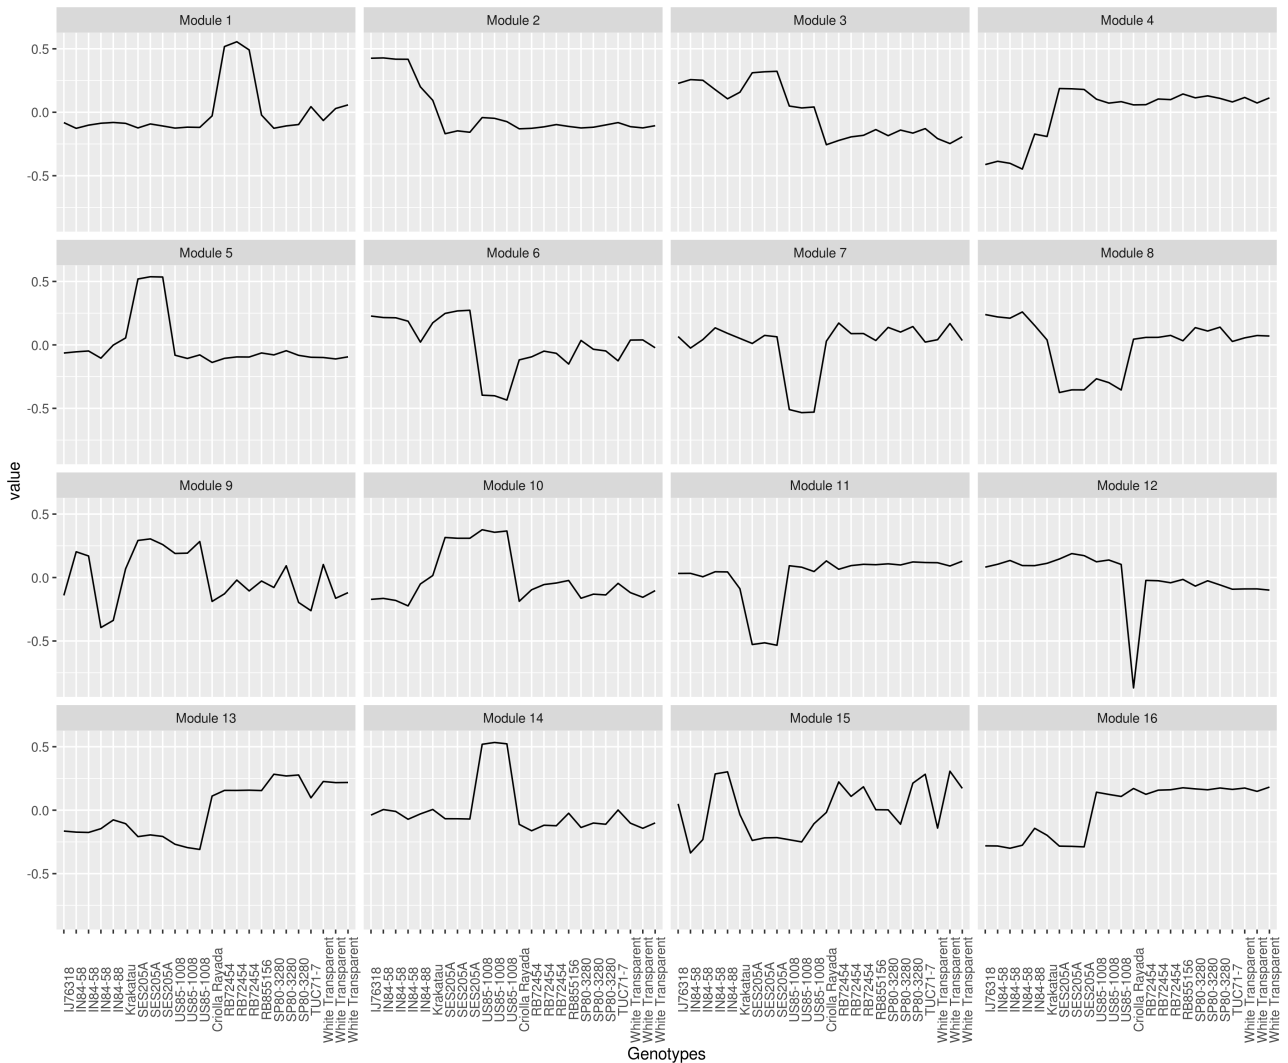

Figure 10: **Expression profile of the eigengenes from each module.**



## 4 Pathway analysis with Gene Ontology terms and MapMan4

We explored the pathways provided by MAPMAN4 to associate up and downregulated DEGs with metabolic processes. We first used all the isoforms of a gene to map to the functional annotation BINs in MERCATOR4. Next, in MAPMAN we used the log fold change of the DEGs identified in each contrast evaluated. Here we present the results of the *metabolism overview* and *lignin* pathways.

### 4.1 Metabolism overview

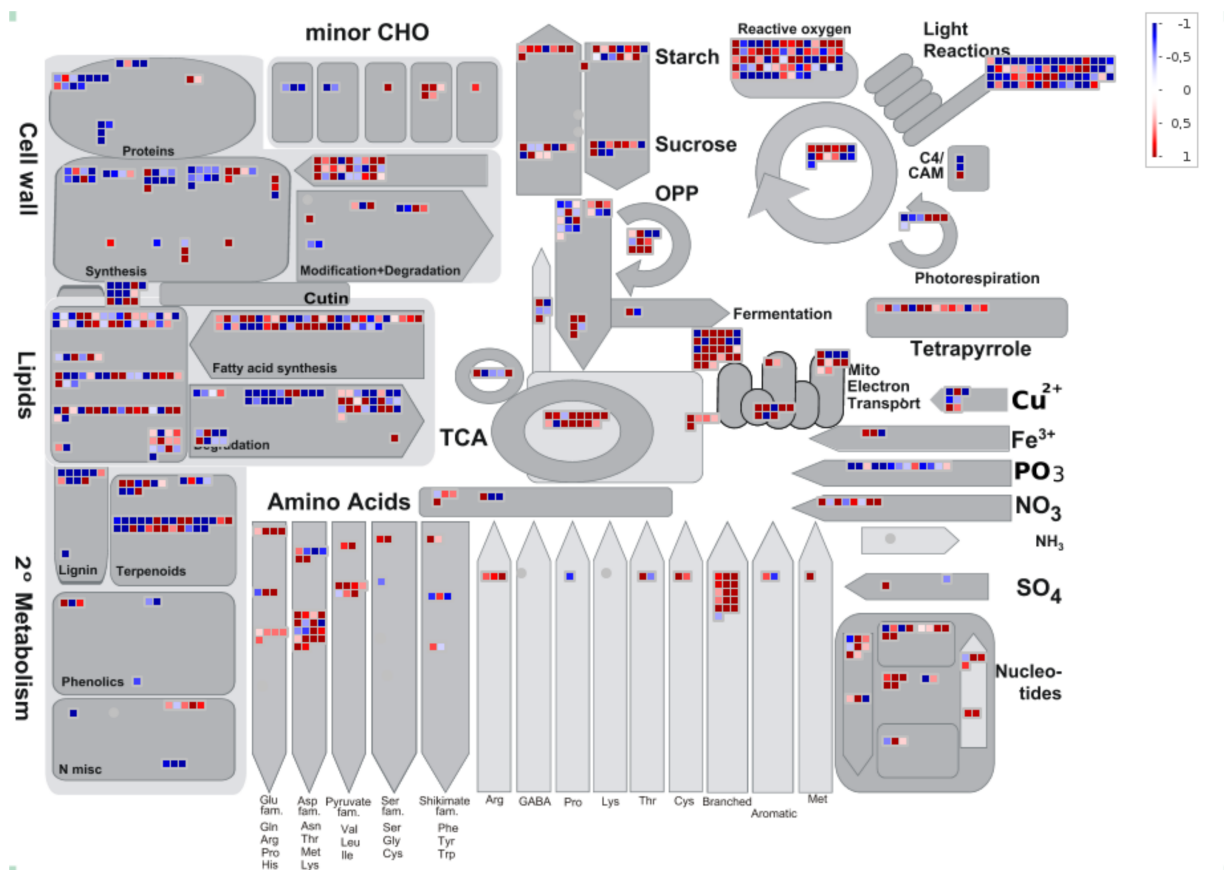

Figure 11: Metabolism overview mapping using the log of fold change of the DEGs from the low biomass genotypes compared to the high biomass group. Genes significantly upregulated were colored in red, while those downregulated were colored in blue.

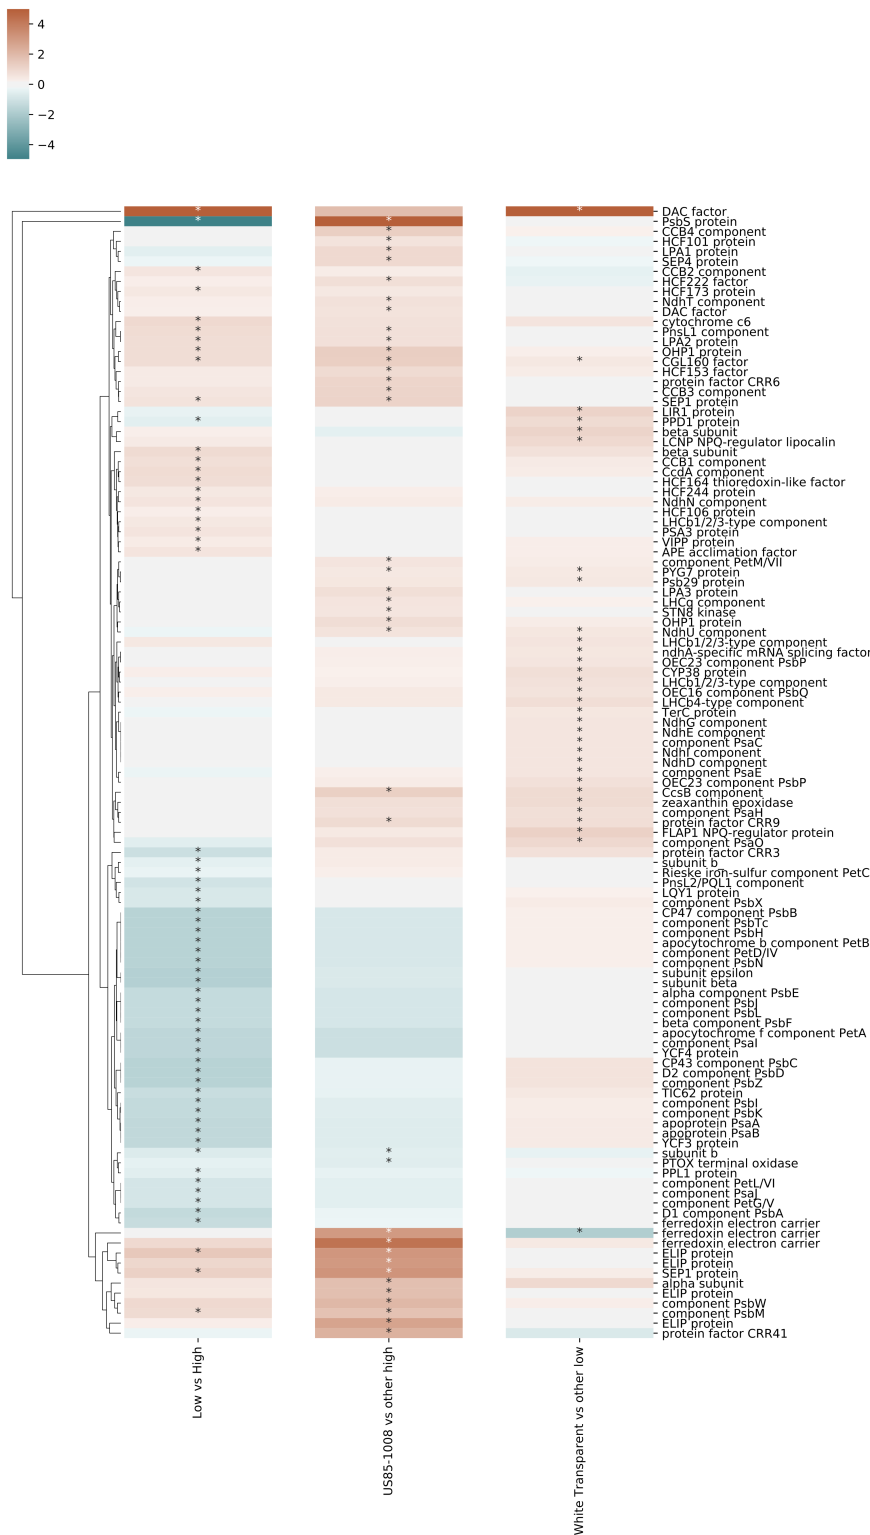

Figure 12: **Heatmap for MapMan Photophosphorylation annotation.** Each column in the heatmap represent the genes fold changes according to a contrast: (i) *Low vs High* is the comparison between the low biomass to the high biomass group; (ii) *US85-1008 vs other high* represents the comparison of US85-1008 to wild high-fiber canes; (iii) *White Transparent vs other low* is the contrast of White Transparent against the low-fiber hybrids. Differentially expressed genes of the contrast are indicated by asterisks.

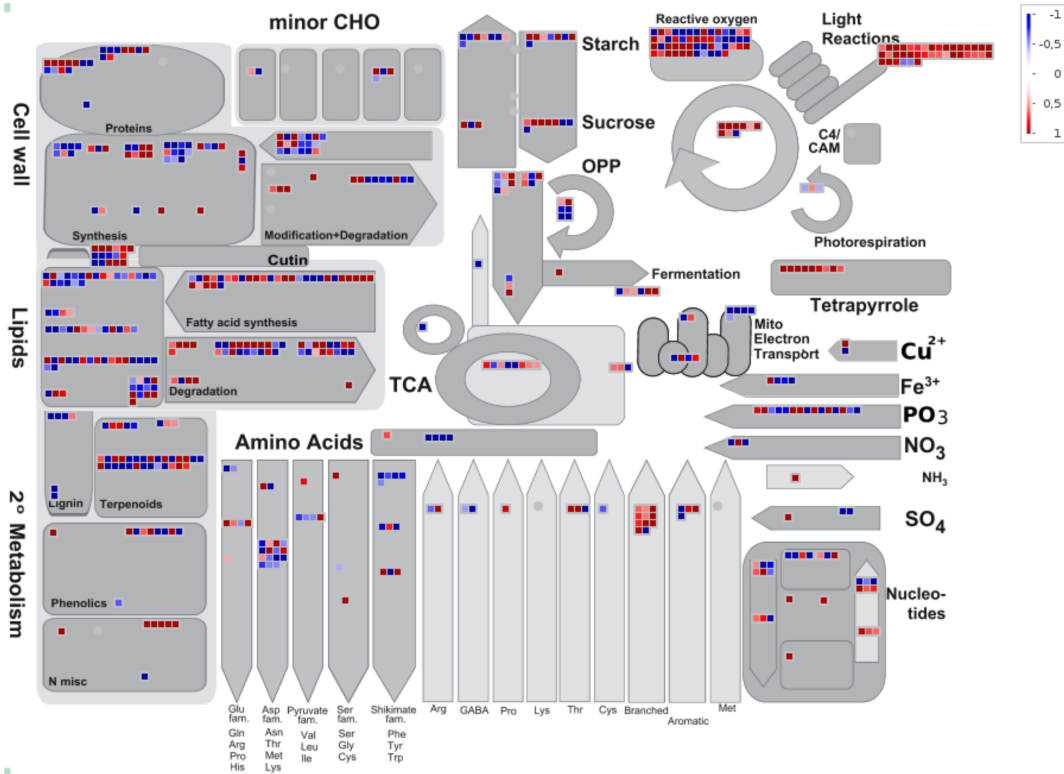

Figure 13: Metabolism overview mapping using the log of fold change of the DEGs from the comparison between US85-1008 and the mean of SES205A and IN84-58. Genes upregulated in US85-1008 were colored in red and those downregulated were colored in blue.

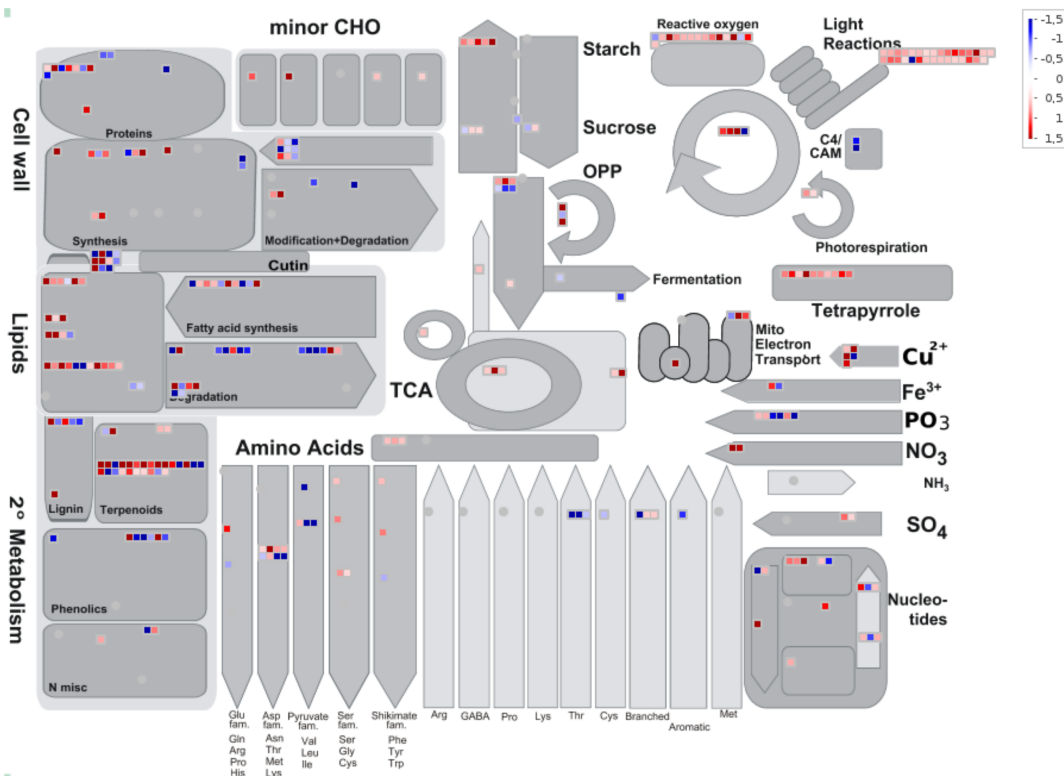

Figure 14: Metabolism overview mapping using the log of fold change of the DEGs from the comparison between White Transparent and the mean of RB72454 and SP80-3280. Genes upregulated in White Transparent were colored in red and those downregulated were colored in blue.

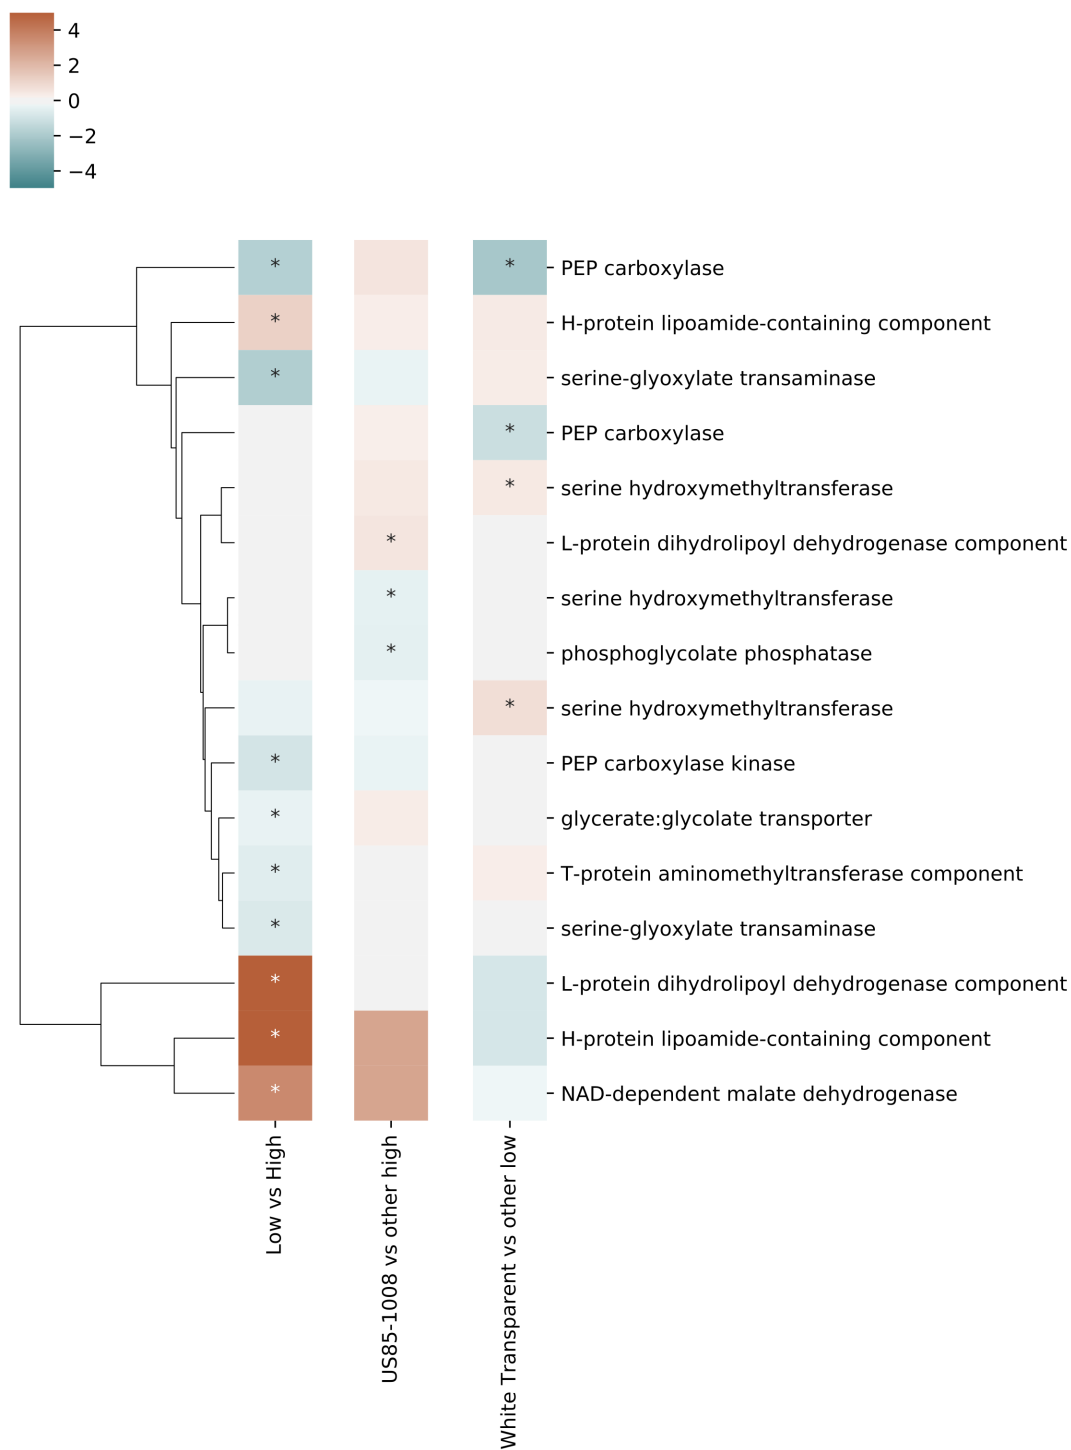

Figure 15: **Heatmap for MapMan C4/CAM photosynthesis and photorespiration annotations.** Each column in the heatmap represent the genes fold changes according to a contrast: (i) *Low vs High* is the comparison between the low biomass to the high biomass group; (ii) *US85-1008 vs other high* represents the comparison of US85-1008 to wild high-fiber canes; (iii) *White Transparent vs other low* is the contrast of White Transparent against the low-fiber hybrids. Differentially expressed genes of the contrast are indicated by asterisks.

## 4.2 Lignin

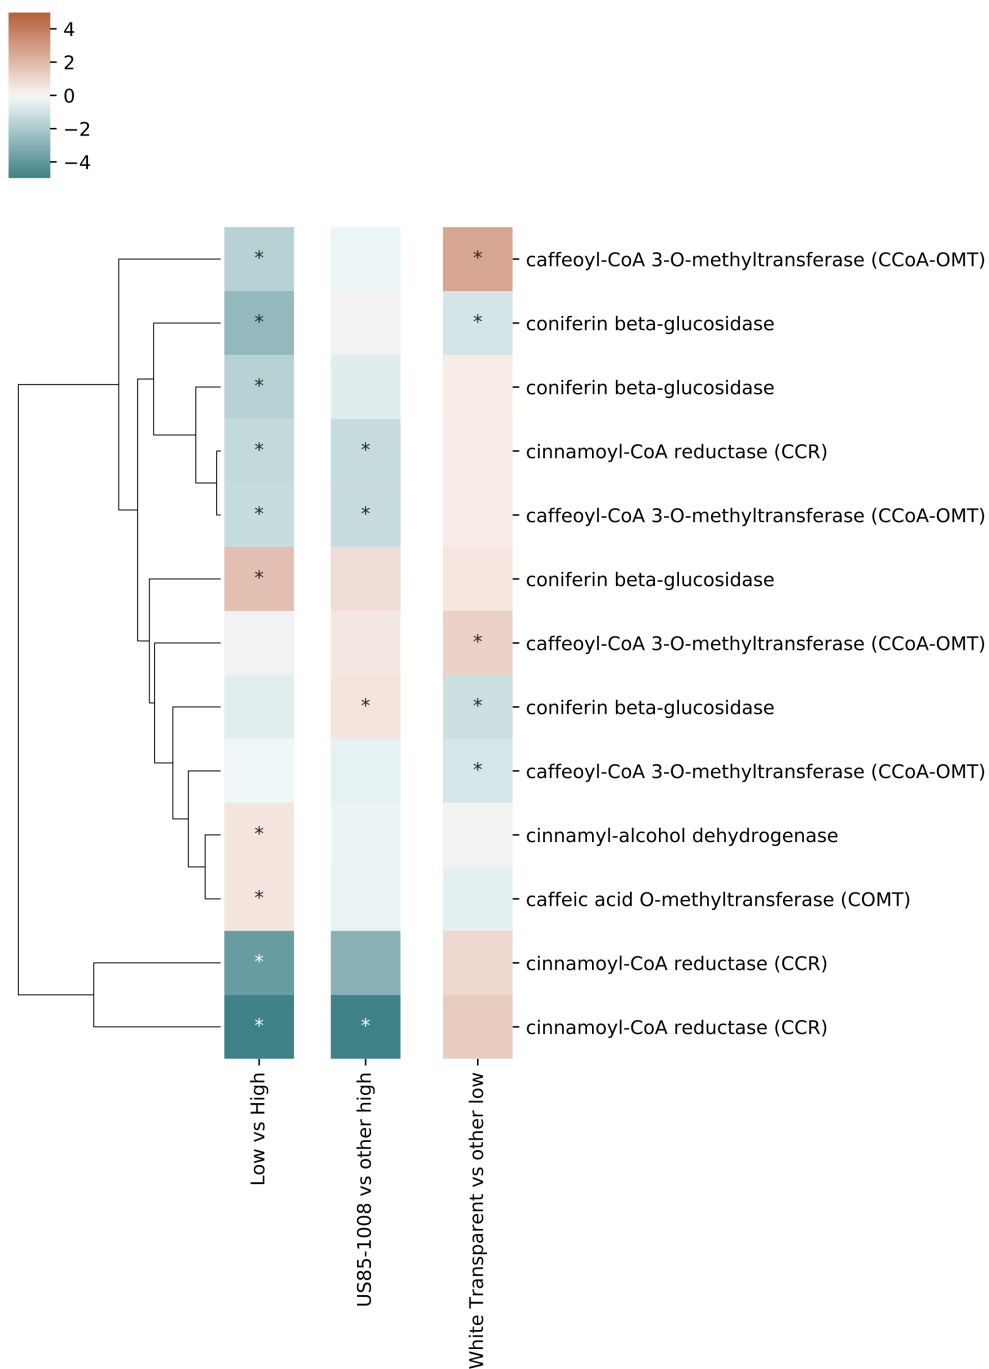

Figure 16: **Heatmap for MapMan monolignol synthesis and monolignol glycosylation and deglycosylation.** Each column in the heatmap represent the genes fold changes according to a contrast: (i) *Low vs High* is the comparison between the low biomass to the high biomass group; (ii) *US85-1008 vs other high* represents the comparison of US85-1008 to wild high-fiber canes; (iii) *White Transparent vs other low* is the contrast of White Transparent against the low-fiber hybrids. Differentially expressed genes of the contrast are indicated by asterisks.

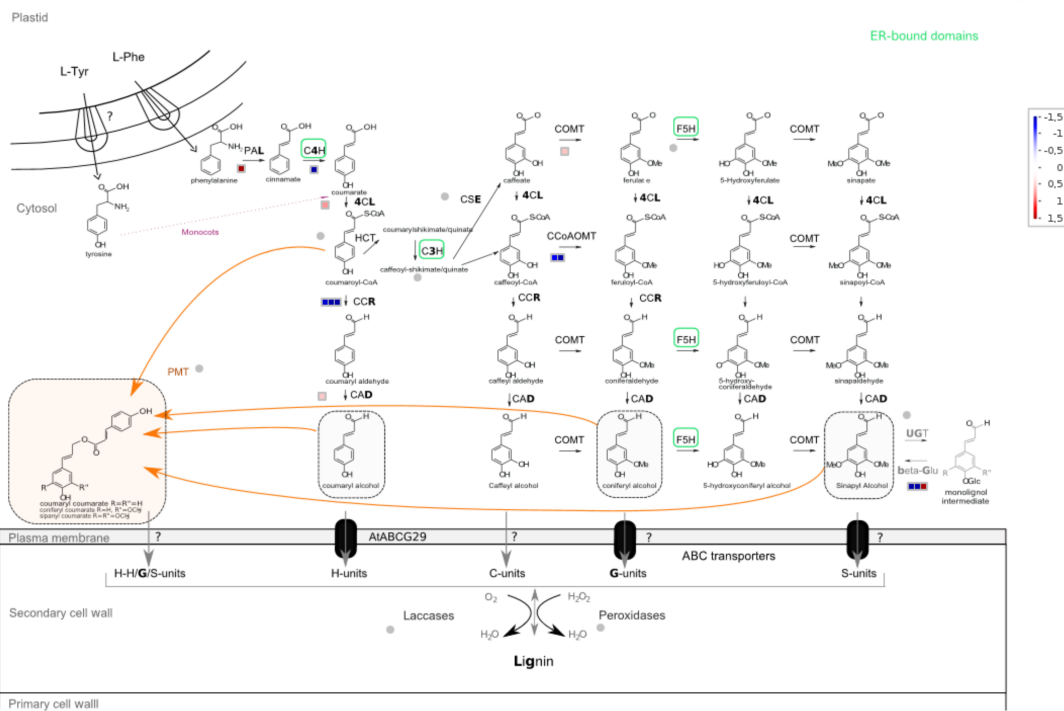

Figure 17: Lignin pathway mapping using the log of fold change of the DEGs from the low biomass genotypes compared to the high biomass group. Genes significantly upregulated were colored in red, while those downregulated were colored in blue.

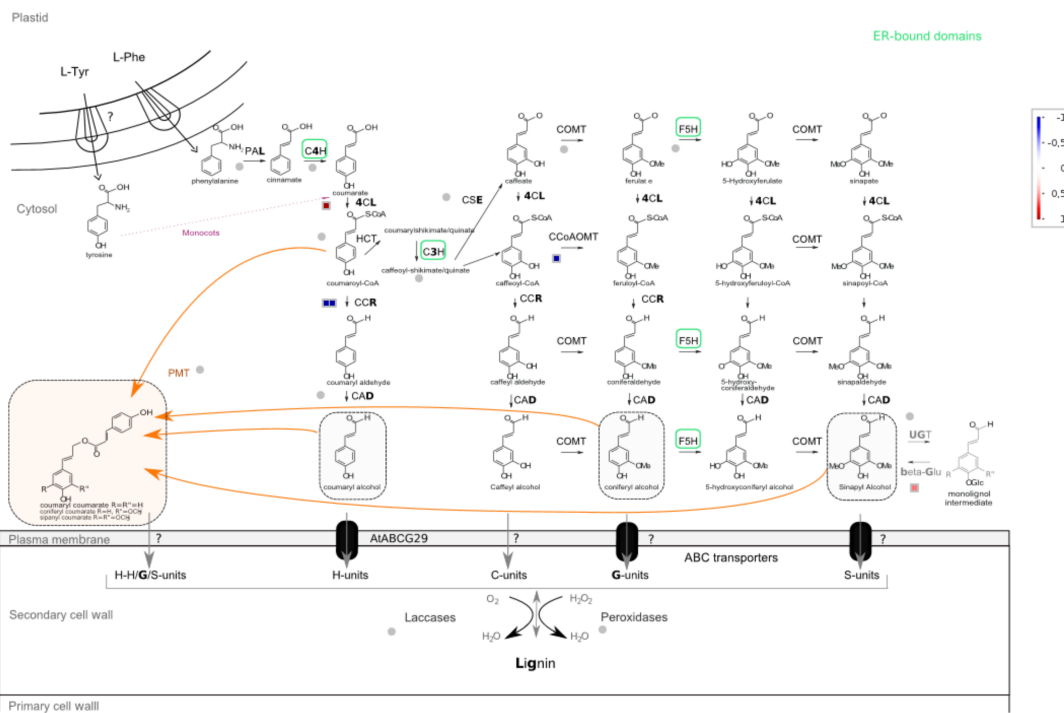

Figure 18: Lignin pathway mapping using the log of fold change of the DEGs from the comparison between US85-1008 and the mean of SES205A and IN84-58. Genes upregulated in US85-1008 were colored in red and those downregulated were colored in blue.

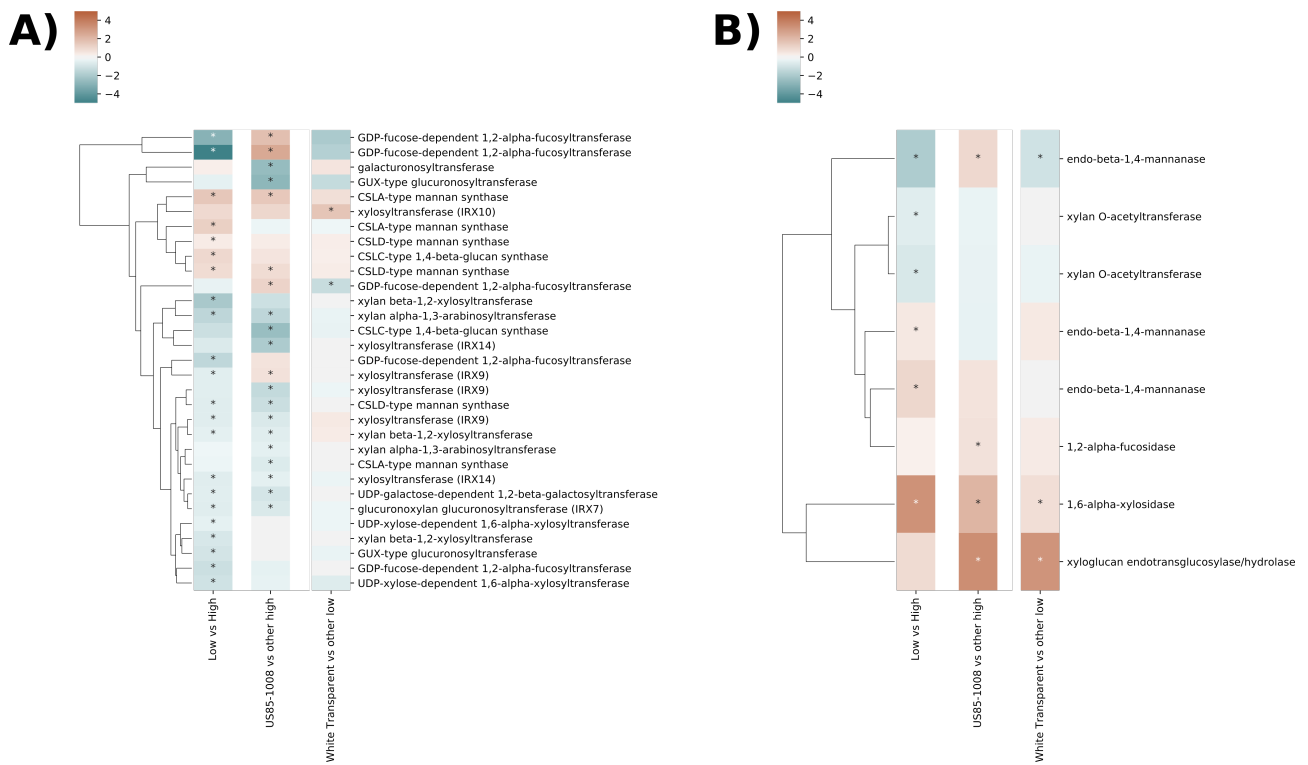

Figure 19: **Heatmap for MapMan synthesis (A) and modification and degradation (B) of the cell wall compounds.** Each column in the heatmap represent the genes fold changes according to a contrast: (i) *Low vs High* is the comparison between the low biomass to the high biomass group; (ii) *US85-1008 vs other high* represents the comparison of US85-1008 to wild high-fiber canes; (iii) *White Transparent vs other low* is the contrast of White Transparent against the low-fiber hybrids. Differentially expressed genes of the contrast are indicated by asterisks.

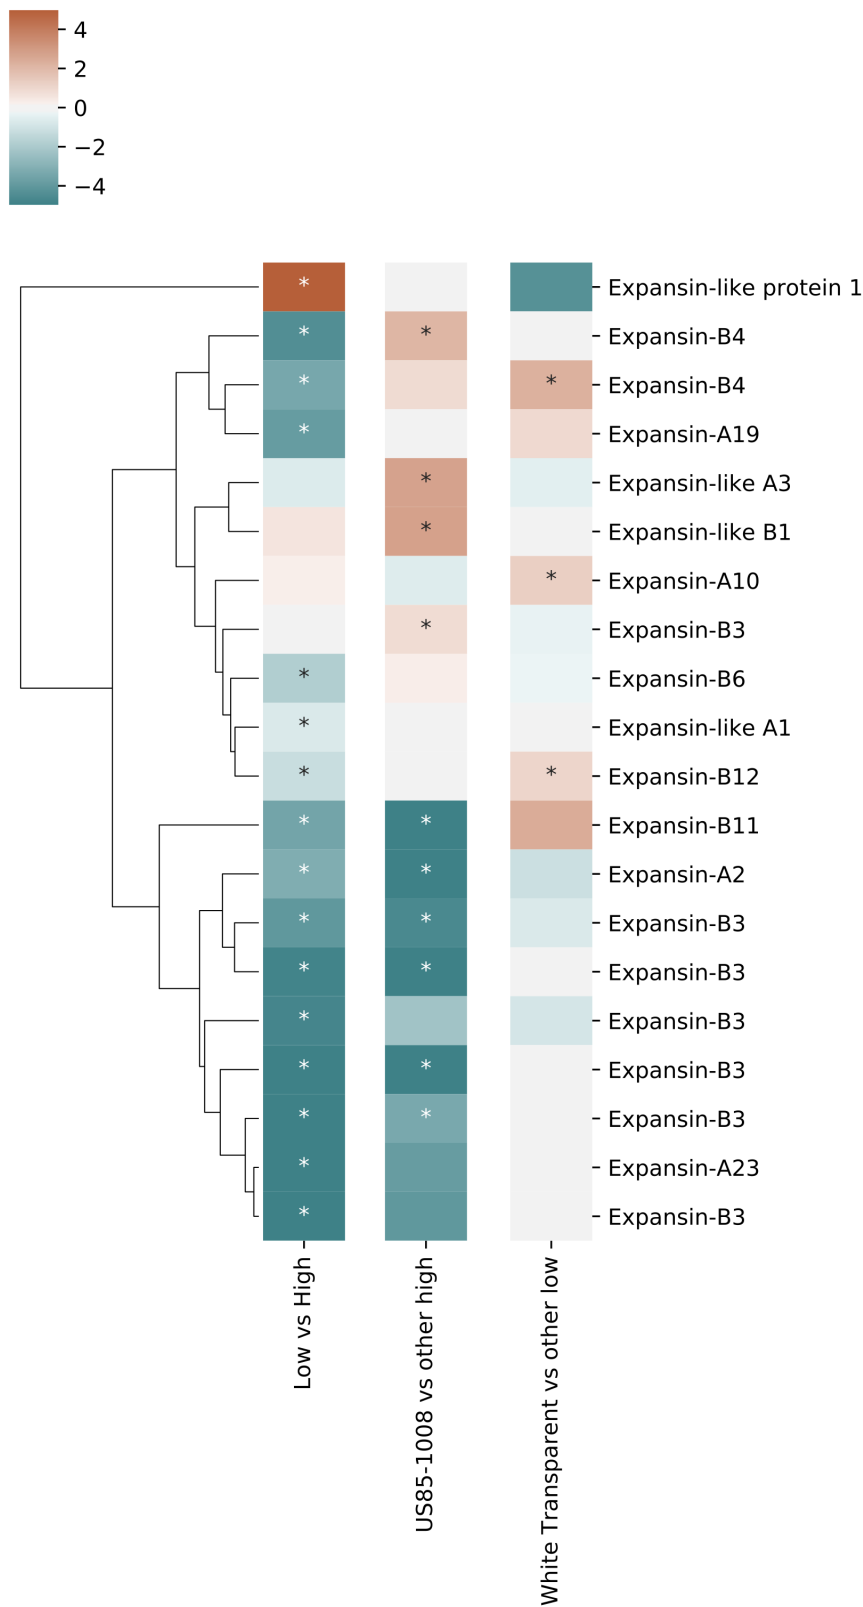

Figure 20: **Expression of DEGs coding for expansins.** Each column in the heatmap represent the genes fold changes according to a contrast: (i) *Low vs High* is the comparison between the low biomass to the high biomass group; (ii) *US85-1008 vs other high* represents the comparison of US85-1008 to wild high-fiber canes; (iii) *White Transparent vs other low* is the contrast of White Transparent against the low-fiber hybrids. Differentially expressed genes of the contrast are indicated by asterisks.



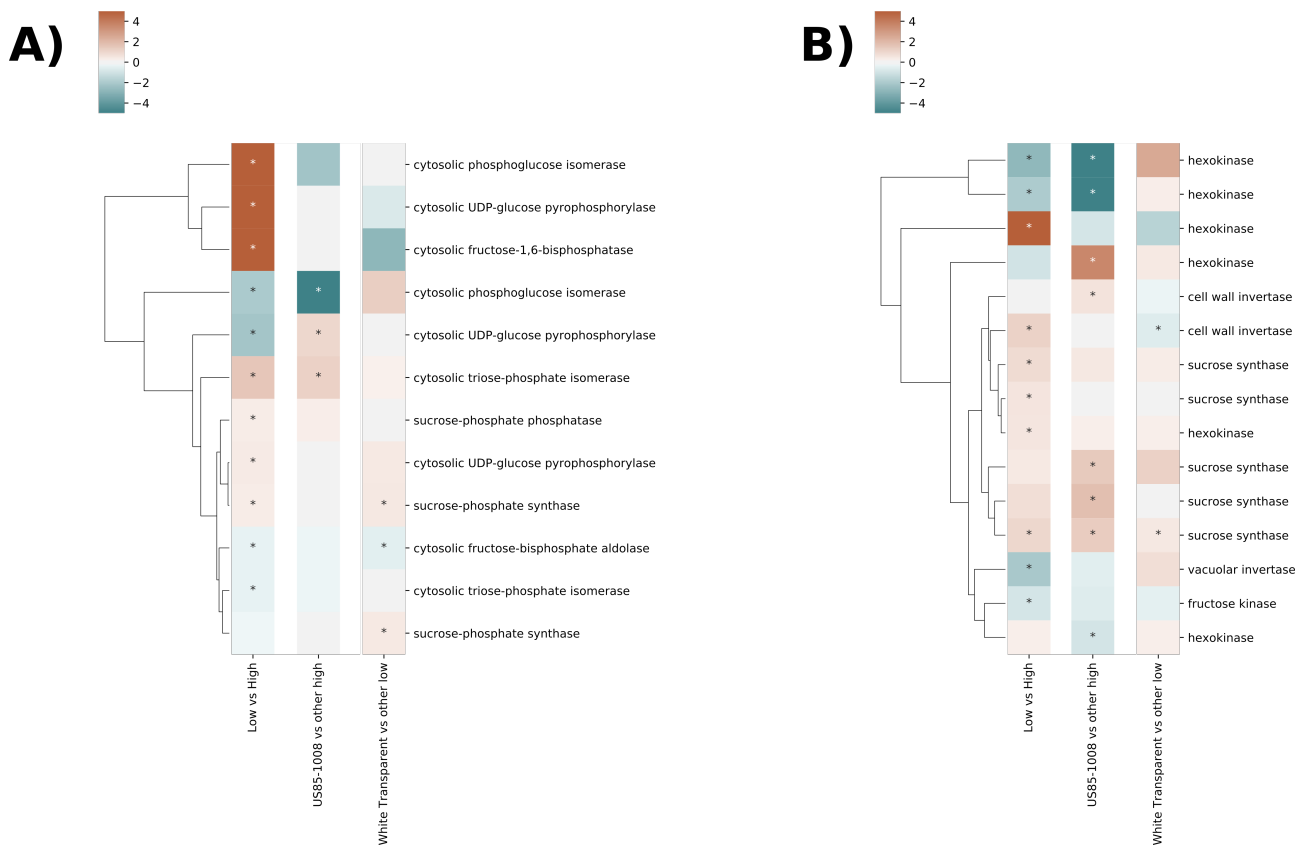

Figure 21: **Heatmap for MapMan sucrose metabolism of synthesis (A) and degradation (B).** Each column in the heatmap represent the genes fold changes according to a contrast: (i) *Low vs High* is the comparison between the low biomass to the high biomass group; (ii) *US85-1008 vs other high* represents the comparison of US85-1008 to wild high-fiber canes; (iii) *White Transparent vs other low* is the contrast of White Transparent against the low-fiber hybrids. Differentially expressed genes of the contrast are indicated by asterisks.

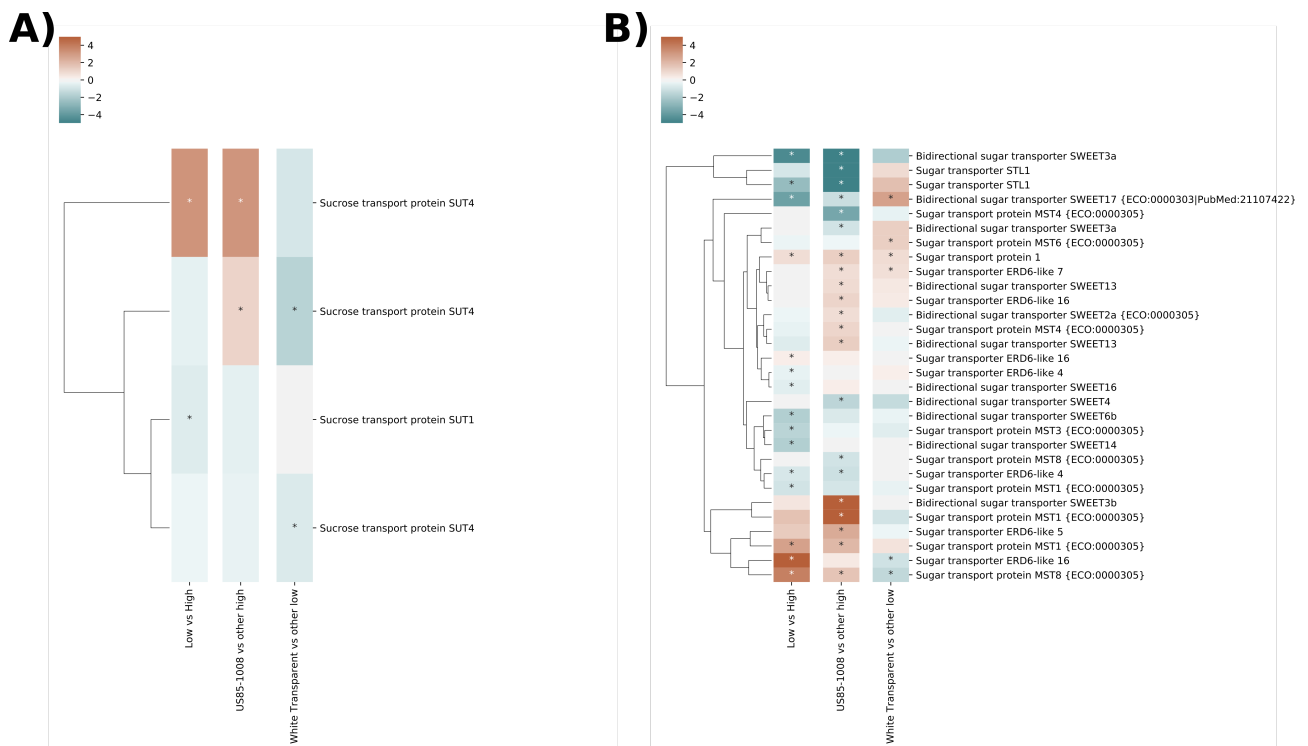

Figure 22: **Expression of DEGs coding for sucrose transport proteins (A) and sugar transporters (B).** Each column in the heatmap represent the genes fold changes according to a contrast: (i) *Low vs High* is the comparison between the low biomass to the high biomass group; (ii) *US85-1008 vs other high* represents the comparison of US85-1008 to wild high-fiber canes; (iii) *White Transparent vs other low* is the contrast of White Transparent against the low-fiber hybrids. Differentially expressed genes of the contrast are indicated by asterisks.

### 4.3 Expression of investigated genes

In this subsection we present the log of counts per million (logCPM) in the three contrasts for genes investigated by their biological relevance. Expression of four genes encoding sucrose synthase (SuSy) are in Table 4.

Table 4: Expression of sucrose synthase genes. The expression levels, in logCPM, were obtained from the contrast comparing the two phenotypically distinct groups and from the contrast within each group. Asterisk indicates if the gene is differentially expressed in the contrast.

|                        | <b>Low fiber</b>  | <b>US85-1008</b>        | <b><i>S. officinarum</i></b> |
|------------------------|-------------------|-------------------------|------------------------------|
|                        | <b>vs</b>         | <b>vs</b>               | <b>vs</b>                    |
|                        | <b>High fiber</b> | <b>other high fiber</b> | <b>other low fiber</b>       |
| trinity_dn11006_c0_g1  | 3.659             | 3.047*                  | 3.829                        |
| trinity_dn11963_c0_g1  | 6.04*             | 5.692                   | 6.317                        |
| trinity_dn141746_c0_g1 | -0.338            | -0.355*                 | -0.473                       |
| trinity_dn14183_c0_g1  | 1.672*            | 1.262                   | 2.048                        |
| trinity_dn931_c0_g1    | 6.833*            | 6.412*                  | 7.186*                       |

## References

- [1] Rob Patro, Geet Duggal, Michael I Love, Rafael A Irizarry, and Carl Kingsford. Salmon: fast and bias-aware quantification of transcript expression using dual-phase inference. *Nature Methods*, 14(4):417–419, 2017.
